# Supplementary material for: Exploring chemical and conformational spaces by batch mode deep active learning
Source: Royal Society of Chemistry journal article supplement (doi:10.1039/d2dd00034b), 2022-01-01
Supplement: d2dd00034b1.pdf [file d2dd00034b1.pdf]

# Supplementary Information

## Exploring Chemical and Conformational Spaces by Batch Mode Deep Active Learning

Viktor Zaverkin,<sup>a</sup> David Holzmüller,<sup>b</sup> Ingo Steinwart,<sup>b</sup> Johannes Kästner<sup>\*a</sup>

July 11, 2022

### 1 MD17

Here, additional results on the aspirin molecules from the MD17 data set<sup>1-4</sup> are presented. Table 1 and Table 2 present the numerical values for the mean absolute error (MAE), root-mean-square error (RMSE), maximum error (MAXE), Pearson (PCC) and Spearman (SRC) correlation coefficients, as well as 95% quantile, evaluated on test data for total energies and forces. While Table 1 provides us with the errors averaged over the learning curve, Table 2 shows the performance of the final model. All results are given for the  $(10, 100; 10)_{\text{MD17}}$  BMDAL experiment. The respective results for  $(100, 1000; 100)_{\text{MD17}}$  can be found in Table 3 and Table 4. The measure of uncertainty for MAXDIST and LCMD is given by the distance to the closest point in the training set, where the distance is measured with respect to the corresponding kernel.

Fig. 1, Fig. 2, and Fig. 3 complement the results obtained in the main manuscript on atomic forces with the results for the total energy. Fig. 4, Fig. 5, and Fig. 6 present the batch size dependence and the learning curves for  $(100, 1000; \{10, 25, 50, 100\})_{\text{MD17}}$  or  $(100, 1000; 100)_{\text{MD17}}$ , respectively.

---

<sup>a</sup> University of Stuttgart, Faculty of Chemistry, Institute for Theoretical Chemistry. E-mail: kaestner@theochem.uni-stuttgart.de

<sup>b</sup> University of Stuttgart, Faculty of Mathematics and Physics, Institute for Stochastics and Applications.

Table 1 The mean absolute error (MAE), root-mean-square error (RMSE), maximum error (MAXE), Pearson (PCC) and Spearman (SRC) correlation coefficients for total energies and atomic forces evaluated on test data. All values are computed for (10, 100; 10)<sub>MD17</sub> as an average over AL steps. The energy errors are given in kcal/mol, while the force errors are in kcal/mol/Å. All times are given in seconds. Standard errors on the mean are given in parentheses.

| Method           | Energy      |             |             |             |             |             | Force       |             |             |              |              |             | Time           |             |
|------------------|-------------|-------------|-------------|-------------|-------------|-------------|-------------|-------------|-------------|--------------|--------------|-------------|----------------|-------------|
|                  | MAE         | RMSE        | MAXE        | PCC         | SRC         | 95%         | MAE         | RMSE        | MAXE        | PCC          | SRC          | 95%         | Kernel         | Selection   |
| MAXDIAG+RND      | 0.89 (0.03) | 1.18 (0.05) | 9.15 (0.91) | 0.00 (0.00) | 0.00 (0.00) | 2.34 (0.09) | 1.96 (0.06) | 2.89 (0.09) | 6.04 (0.44) | -0.00 (0.00) | -0.00 (0.00) | 2.78 (0.09) | 0.00 (0.00)    | 0.03 (0.00) |
| MAXDIAG+AE(E)    | 1.11 (0.06) | 1.44 (0.07) | 8.90 (0.81) | 1.00 (0.00) | 1.00 (0.00) | 2.87 (0.15) | 2.52 (0.09) | 3.74 (0.14) | 6.40 (0.40) | 0.24 (0.02)  | 0.19 (0.02)  | 3.49 (0.13) | 106.82 (2.68)  | 0.03 (0.00) |
| MAXDIAG+AE(F)    | 1.04 (0.05) | 1.35 (0.06) | 8.35 (0.73) | 0.24 (0.02) | 0.19 (0.02) | 2.68 (0.13) | 2.34 (0.08) | 3.43 (0.12) | 5.56 (0.26) | 1.00 (0.00)  | 1.00 (0.00)  | 3.22 (0.11) | 114.61 (11.21) | 0.35 (0.33) |
| MAXDIAG+QBC(E)   | 1.09 (0.04) | 1.41 (0.06) | 6.92 (0.50) | 0.44 (0.04) | 0.47 (0.03) | 2.32 (0.09) | 2.46 (0.08) | 3.64 (0.13) | 5.60 (0.25) | 0.29 (0.02)  | 0.26 (0.02)  | 3.27 (0.11) | 278.63 (8.00)  | 0.05 (0.02) |
| MAXDIAG+QBC(F)   | 1.07 (0.04) | 1.39 (0.05) | 7.06 (0.63) | 0.32 (0.02) | 0.29 (0.02) | 2.30 (0.09) | 2.38 (0.05) | 3.50 (0.08) | 5.32 (0.25) | 0.71 (0.01)  | 0.72 (0.01)  | 3.18 (0.07) | 280.22 (3.69)  | 0.03 (0.00) |
| MAXDIAG+GP(LL)   | 1.07 (0.05) | 1.39 (0.07) | 9.12 (0.83) | 0.08 (0.02) | 0.05 (0.02) | 2.75 (0.13) | 2.38 (0.10) | 3.51 (0.16) | 5.94 (0.30) | 0.23 (0.04)  | 0.19 (0.04)  | 3.30 (0.14) | 56.21 (1.58)   | 0.03 (0.00) |
| MAXDIAG+GP(RP)   | 1.07 (0.05) | 1.39 (0.07) | 9.34 (1.04) | 0.17 (0.01) | 0.13 (0.01) | 2.77 (0.15) | 2.42 (0.08) | 3.57 (0.12) | 6.28 (0.47) | 0.48 (0.01)  | 0.46 (0.01)  | 3.35 (0.10) | 78.10 (2.96)   | 0.03 (0.00) |
| MAXDET+GP(LL)    | 0.87 (0.04) | 1.13 (0.05) | 7.37 (0.52) | 0.08 (0.01) | 0.05 (0.01) | 2.25 (0.10) | 1.91 (0.05) | 2.79 (0.09) | 5.02 (0.27) | 0.23 (0.04)  | 0.19 (0.04)  | 2.64 (0.08) | 66.54 (5.18)   | 0.89 (0.18) |
| MAXDET+GP(RP)    | 0.87 (0.03) | 1.12 (0.04) | 7.07 (0.53) | 0.14 (0.01) | 0.11 (0.01) | 2.23 (0.09) | 1.89 (0.06) | 2.74 (0.09) | 4.53 (0.21) | 0.47 (0.01)  | 0.45 (0.01)  | 2.57 (0.08) | 87.37 (2.67)   | 0.58 (0.04) |
| MAXDIST+GP(LL)   | 0.85 (0.03) | 1.10 (0.04) | 7.14 (0.52) | 0.13 (0.01) | 0.11 (0.01) | 2.19 (0.09) | 1.92 (0.06) | 2.80 (0.09) | 4.67 (0.22) | 0.42 (0.02)  | 0.41 (0.02)  | 2.63 (0.08) | 54.69 (1.29)   | 4.08 (0.31) |
| MAXDIST+GP(RP)   | 0.86 (0.04) | 1.12 (0.05) | 7.01 (0.57) | 0.15 (0.01) | 0.12 (0.01) | 2.22 (0.11) | 1.91 (0.07) | 2.79 (0.11) | 4.62 (0.27) | 0.49 (0.01)  | 0.47 (0.01)  | 2.62 (0.09) | 77.62 (1.20)   | 3.38 (0.18) |
| MAXDIST+FEAT(LL) | 0.88 (0.04) | 1.15 (0.05) | 7.32 (0.58) | 0.09 (0.01) | 0.07 (0.01) | 2.29 (0.10) | 1.90 (0.05) | 2.78 (0.08) | 4.86 (0.25) | 0.29 (0.02)  | 0.28 (0.02)  | 2.63 (0.07) | 54.59 (4.18)   | 3.72 (0.31) |
| MAXDIST+FEAT(RP) | 0.88 (0.03) | 1.14 (0.04) | 7.43 (0.67) | 0.11 (0.01) | 0.09 (0.01) | 2.26 (0.09) | 1.91 (0.06) | 2.79 (0.10) | 5.17 (0.48) | 0.34 (0.02)  | 0.32 (0.02)  | 2.63 (0.09) | 78.70 (7.36)   | 3.45 (0.36) |
| LCMD+FEAT(LL)    | 0.89 (0.04) | 1.16 (0.05) | 7.90 (0.67) | 0.11 (0.01) | 0.07 (0.01) | 2.30 (0.10) | 1.92 (0.05) | 2.80 (0.08) | 5.33 (0.32) | 0.33 (0.02)  | 0.29 (0.02)  | 2.67 (0.07) | 63.11 (1.69)   | 4.65 (0.22) |
| LCMD+FEAT(RP)    | 0.87 (0.03) | 1.13 (0.04) | 8.05 (0.70) | 0.12 (0.01) | 0.10 (0.01) | 2.23 (0.09) | 1.92 (0.05) | 2.81 (0.09) | 5.50 (0.55) | 0.38 (0.02)  | 0.35 (0.02)  | 2.66 (0.08) | 86.78 (1.71)   | 4.07 (0.21) |

Table 2 The mean absolute error (MAE), root-mean-square error (RMSE), maximum error (MAXE), Pearson (PCC) and Spearman (SRC) correlation coefficients for total energies and atomic forces evaluated on test data. All values are computed employing the final model obtained for the (10, 100; 10)MD17 experiment. The energy errors are given in kcal/mol, while the force errors are in kcal/mol/Å. Standard errors on the mean are given in parentheses.

| Method           | Energy      |             |             |             |             | Force       |             |             |             |              |              |             |
|------------------|-------------|-------------|-------------|-------------|-------------|-------------|-------------|-------------|-------------|--------------|--------------|-------------|
|                  | MAE         | RMSE        | MAXE        | PCC         | SRC         | 95%         | MAE         | RMSE        | MAXE        | PCC          | SRC          | 95%         |
| MAXDIAG+RND      | 0.61 (0.01) | 0.79 (0.02) | 6.06 (0.54) | 0.00 (0.00) | 0.00 (0.00) | 1.56 (0.03) | 1.26 (0.02) | 1.83 (0.02) | 4.12 (0.47) | -0.00 (0.00) | -0.00 (0.00) | 1.81 (0.02) |
| MAXDIAG+AE(E)    | 0.78 (0.04) | 1.00 (0.05) | 5.63 (0.52) | 1.00 (0.00) | 1.00 (0.00) | 1.98 (0.11) | 1.81 (0.05) | 2.66 (0.08) | 4.60 (0.37) | 0.21 (0.01)  | 0.16 (0.01)  | 2.47 (0.08) |
| MAXDIAG+AE(F)    | 0.72 (0.03) | 0.92 (0.03) | 4.77 (0.26) | 0.20 (0.02) | 0.15 (0.02) | 1.82 (0.06) | 1.64 (0.04) | 2.38 (0.06) | 3.84 (0.21) | 1.00 (0.00)  | 1.00 (0.00)  | 2.22 (0.05) |
| MAXDIAG+QBC(E)   | 0.77 (0.02) | 0.99 (0.03) | 5.12 (0.40) | 0.36 (0.02) | 0.40 (0.02) | 1.67 (0.03) | 1.77 (0.04) | 2.62 (0.07) | 4.22 (0.15) | 0.26 (0.02)  | 0.23 (0.02)  | 2.35 (0.05) |
| MAXDIAG+QBC(F)   | 0.73 (0.01) | 0.95 (0.02) | 5.48 (0.63) | 0.30 (0.03) | 0.27 (0.02) | 1.63 (0.04) | 1.65 (0.02) | 2.41 (0.04) | 3.75 (0.21) | 0.70 (0.01)  | 0.71 (0.01)  | 2.21 (0.03) |
| MAXDIAG+GP(LL)   | 0.77 (0.01) | 0.99 (0.01) | 6.29 (0.47) | 0.07 (0.02) | 0.05 (0.01) | 1.98 (0.03) | 1.69 (0.04) | 2.48 (0.07) | 4.02 (0.11) | 0.25 (0.01)  | 0.21 (0.01)  | 2.33 (0.06) |
| MAXDIAG+GP(RP)   | 0.72 (0.02) | 0.93 (0.03) | 5.61 (0.43) | 0.15 (0.02) | 0.12 (0.01) | 1.84 (0.06) | 1.64 (0.03) | 2.38 (0.05) | 4.74 (0.46) | 0.50 (0.01)  | 0.48 (0.01)  | 2.24 (0.05) |
| MAXDET+GP(LL)    | 0.58 (0.01) | 0.75 (0.01) | 4.56 (0.29) | 0.06 (0.01) | 0.04 (0.00) | 1.50 (0.03) | 1.29 (0.02) | 1.85 (0.03) | 3.00 (0.08) | 0.25 (0.04)  | 0.21 (0.04)  | 1.76 (0.03) |
| MAXDET+GP(RP)    | 0.59 (0.01) | 0.75 (0.01) | 4.91 (0.41) | 0.13 (0.01) | 0.11 (0.00) | 1.50 (0.04) | 1.24 (0.03) | 1.78 (0.04) | 2.98 (0.07) | 0.49 (0.01)  | 0.47 (0.01)  | 1.68 (0.04) |
| MAXDIST+GP(LL)   | 0.58 (0.01) | 0.74 (0.01) | 4.67 (0.23) | 0.12 (0.01) | 0.11 (0.01) | 1.48 (0.02) | 1.24 (0.03) | 1.79 (0.04) | 2.91 (0.09) | 0.43 (0.02)  | 0.42 (0.02)  | 1.69 (0.04) |
| MAXDIST+GP(RP)   | 0.56 (0.02) | 0.73 (0.03) | 4.57 (0.49) | 0.13 (0.01) | 0.11 (0.01) | 1.45 (0.05) | 1.25 (0.03) | 1.79 (0.04) | 2.95 (0.12) | 0.50 (0.01)  | 0.49 (0.01)  | 1.70 (0.04) |
| MAXDIST+FEAT(LL) | 0.60 (0.01) | 0.77 (0.01) | 4.66 (0.34) | 0.08 (0.01) | 0.06 (0.01) | 1.53 (0.03) | 1.25 (0.03) | 1.79 (0.05) | 3.43 (0.32) | 0.30 (0.01)  | 0.28 (0.01)  | 1.71 (0.04) |
| MAXDIST+FEAT(RP) | 0.58 (0.01) | 0.75 (0.01) | 4.56 (0.28) | 0.08 (0.01) | 0.07 (0.01) | 1.48 (0.03) | 1.22 (0.02) | 1.75 (0.04) | 3.38 (0.35) | 0.34 (0.02)  | 0.33 (0.02)  | 1.68 (0.03) |
| LCMD+FEAT(LL)    | 0.59 (0.02) | 0.77 (0.02) | 5.36 (0.52) | 0.10 (0.01) | 0.07 (0.01) | 1.52 (0.04) | 1.22 (0.03) | 1.75 (0.05) | 3.83 (0.46) | 0.37 (0.03)  | 0.32 (0.04)  | 1.70 (0.04) |
| LCMD+FEAT(RP)    | 0.58 (0.02) | 0.74 (0.02) | 4.21 (0.32) | 0.10 (0.01) | 0.08 (0.01) | 1.46 (0.03) | 1.24 (0.04) | 1.79 (0.06) | 3.50 (0.19) | 0.40 (0.03)  | 0.38 (0.03)  | 1.71 (0.06) |

Table 3 The mean absolute error (MAE), root-mean-square error (RMSE), maximum error (MAXE), Pearson (PCC) and Spearman (SRC) correlation coefficients for total energies and atomic forces evaluated on test data. All values are computed for (100,1000;100)<sub>MD17</sub> as an average over AL steps. The energy errors are given in kcal/mol, while the force errors are in kcal/mol/Å. All times are given in seconds. Standard errors on the mean are given in parentheses.

| Method           | Energy      |             |             |              |              |             | Force       |             |             |             |             |             | Time           |              |
|------------------|-------------|-------------|-------------|--------------|--------------|-------------|-------------|-------------|-------------|-------------|-------------|-------------|----------------|--------------|
|                  | MAE         | RMSE        | MAXE        | PCC          | SRC          | 95%         | MAE         | RMSE        | MAXE        | PCC         | SRC         | 95%         | Kernel         | Selection    |
| MAXDIAG+RND      | 0.49 (0.01) | 0.64 (0.01) | 4.46 (0.26) | -0.00 (0.00) | -0.00 (0.00) | 1.26 (0.03) | 0.91 (0.02) | 1.30 (0.03) | 3.12 (0.25) | 0.00 (0.00) | 0.00 (0.00) | 1.30 (0.03) | 0.01 (0.00)    | 0.03 (0.00)  |
| MAXDIAG+AE(E)    | 0.52 (0.01) | 0.66 (0.01) | 3.81 (0.26) | 1.00 (0.00)  | 1.00 (0.00)  | 1.32 (0.03) | 1.13 (0.02) | 1.64 (0.03) | 3.45 (0.24) | 0.18 (0.01) | 0.15 (0.01) | 1.58 (0.03) | 107.43 (8.03)  | 0.02 (0.00)  |
| MAXDIAG+AE(F)    | 0.51 (0.01) | 0.66 (0.01) | 3.93 (0.21) | 0.21 (0.01)  | 0.17 (0.01)  | 1.31 (0.03) | 1.09 (0.02) | 1.58 (0.03) | 2.76 (0.16) | 1.00 (0.00) | 1.00 (0.00) | 1.51 (0.03) | 103.73 (2.92)  | 0.03 (0.00)  |
| MAXDIAG+QBC(E)   | 0.52 (0.01) | 0.67 (0.01) | 3.62 (0.14) | 0.26 (0.01)  | 0.29 (0.01)  | 1.19 (0.02) | 1.08 (0.01) | 1.57 (0.02) | 2.76 (0.10) | 0.27 (0.01) | 0.24 (0.01) | 1.47 (0.01) | 254.17 (6.19)  | 0.03 (0.00)  |
| MAXDIAG+QBC(F)   | 0.51 (0.01) | 0.66 (0.01) | 3.66 (0.18) | 0.21 (0.01)  | 0.21 (0.01)  | 1.18 (0.02) | 1.06 (0.01) | 1.52 (0.02) | 2.47 (0.07) | 0.69 (0.01) | 0.71 (0.01) | 1.44 (0.01) | 283.63 (5.86)  | 0.03 (0.00)  |
| MAXDIAG+GP(LL)   | 0.51 (0.01) | 0.66 (0.02) | 3.98 (0.21) | 0.13 (0.01)  | 0.10 (0.01)  | 1.31 (0.04) | 1.04 (0.02) | 1.50 (0.03) | 2.88 (0.17) | 0.49 (0.01) | 0.47 (0.01) | 1.45 (0.03) | 61.45 (2.18)   | 0.03 (0.00)  |
| MAXDIAG+GP(RP)   | 0.51 (0.01) | 0.66 (0.02) | 4.09 (0.30) | 0.16 (0.01)  | 0.13 (0.01)  | 1.31 (0.04) | 1.06 (0.02) | 1.53 (0.04) | 2.87 (0.17) | 0.59 (0.01) | 0.59 (0.01) | 1.48 (0.03) | 77.92 (2.19)   | 0.03 (0.00)  |
| MAXDET+GP(LL)    | 0.49 (0.01) | 0.63 (0.02) | 3.81 (0.16) | 0.11 (0.01)  | 0.09 (0.01)  | 1.25 (0.03) | 0.93 (0.02) | 1.32 (0.03) | 2.28 (0.11) | 0.39 (0.01) | 0.39 (0.01) | 1.28 (0.03) | 63.51 (4.27)   | 11.68 (1.62) |
| MAXDET+GP(RP)    | 0.49 (0.01) | 0.63 (0.02) | 3.66 (0.13) | 0.15 (0.01)  | 0.12 (0.01)  | 1.26 (0.04) | 0.90 (0.02) | 1.27 (0.02) | 2.17 (0.09) | 0.50 (0.01) | 0.50 (0.01) | 1.23 (0.02) | 101.37 (13.68) | 13.94 (4.14) |
| MAXDIST+GP(LL)   | 0.48 (0.01) | 0.62 (0.01) | 3.81 (0.24) | 0.07 (0.01)  | 0.08 (0.01)  | 1.22 (0.03) | 0.88 (0.02) | 1.24 (0.03) | 2.19 (0.11) | 0.36 (0.01) | 0.42 (0.01) | 1.21 (0.03) | 55.09 (1.17)   | 38.03 (1.47) |
| MAXDIST+GP(RP)   | 0.49 (0.01) | 0.63 (0.02) | 3.86 (0.15) | 0.08 (0.01)  | 0.10 (0.01)  | 1.24 (0.03) | 0.88 (0.02) | 1.24 (0.03) | 2.16 (0.09) | 0.40 (0.01) | 0.47 (0.01) | 1.21 (0.03) | 74.48 (1.62)   | 32.75 (1.74) |
| MAXDIST+FEAT(LL) | 0.48 (0.01) | 0.62 (0.01) | 3.94 (0.19) | 0.06 (0.01)  | 0.06 (0.00)  | 1.22 (0.03) | 0.88 (0.02) | 1.25 (0.03) | 2.46 (0.14) | 0.29 (0.01) | 0.31 (0.01) | 1.23 (0.03) | 52.40 (1.25)   | 36.55 (2.47) |
| MAXDIST+FEAT(RP) | 0.49 (0.01) | 0.64 (0.02) | 3.87 (0.21) | 0.05 (0.01)  | 0.06 (0.01)  | 1.26 (0.04) | 0.89 (0.02) | 1.25 (0.03) | 2.36 (0.12) | 0.27 (0.01) | 0.32 (0.01) | 1.22 (0.02) | 73.01 (0.69)   | 30.88 (0.69) |
| LCMID+FEAT(LL)   | 0.48 (0.01) | 0.63 (0.01) | 4.25 (0.38) | 0.12 (0.01)  | 0.09 (0.00)  | 1.24 (0.03) | 0.90 (0.02) | 1.27 (0.02) | 2.80 (0.15) | 0.43 (0.02) | 0.41 (0.01) | 1.27 (0.02) | 69.62 (1.17)   | 51.94 (1.09) |
| LCMID+FEAT(RP)   | 0.49 (0.01) | 0.63 (0.01) | 4.08 (0.23) | 0.09 (0.01)  | 0.08 (0.00)  | 1.24 (0.02) | 0.89 (0.02) | 1.26 (0.02) | 2.92 (0.30) | 0.40 (0.01) | 0.41 (0.01) | 1.26 (0.02) | 93.92 (2.46)   | 42.71 (1.35) |

Table 4 The mean absolute error (MAE), root-mean-square error (RMSE), maximum error (MAXE), Pearson (PCC) and Spearman (SRC) correlation coefficients for total energies and atomic forces evaluated on test data. All values are computed employing the final model obtained for the (100,1000;100)<sub>MD17</sub> experiment. The energy errors are given in kcal/mol, while the force errors are in kcal/mol/Å. Standard errors on the mean are given in parentheses.

| Method           | Energy      |             |             |              |              | Force       |             |             |             |             |             |             |
|------------------|-------------|-------------|-------------|--------------|--------------|-------------|-------------|-------------|-------------|-------------|-------------|-------------|
|                  | MAE         | RMSE        | MAXE        | PCC          | SRC          | 95%         | MAE         | RMSE        | MAXE        | PCC         | SRC         | 95%         |
| MAXDIAG+RND      | 0.37 (0.00) | 0.48 (0.01) | 2.83 (0.12) | -0.00 (0.00) | -0.00 (0.00) | 0.95 (0.01) | 0.66 (0.01) | 0.94 (0.01) | 2.54 (0.19) | 0.00 (0.00) | 0.00 (0.00) | 0.97 (0.01) |
| MAXDIAG+AE(E)    | 0.38 (0.00) | 0.48 (0.00) | 2.19 (0.10) | 1.00 (0.00)  | 1.00 (0.00)  | 0.95 (0.01) | 0.91 (0.02) | 1.34 (0.03) | 2.68 (0.15) | 0.12 (0.01) | 0.10 (0.01) | 1.28 (0.03) |
| MAXDIAG+AE(F)    | 0.38 (0.01) | 0.48 (0.01) | 2.77 (0.21) | 0.18 (0.01)  | 0.15 (0.01)  | 0.95 (0.01) | 0.88 (0.01) | 1.30 (0.01) | 2.03 (0.13) | 1.00 (0.00) | 1.00 (0.00) | 1.22 (0.01) |
| MAXDIAG+QBC(E)   | 0.39 (0.01) | 0.50 (0.01) | 2.50 (0.05) | 0.22 (0.01)  | 0.25 (0.01)  | 0.90 (0.02) | 0.87 (0.01) | 1.28 (0.01) | 1.98 (0.08) | 0.25 (0.01) | 0.23 (0.01) | 1.18 (0.01) |
| MAXDIAG+QBC(F)   | 0.39 (0.01) | 0.50 (0.01) | 2.62 (0.09) | 0.18 (0.00)  | 0.19 (0.00)  | 0.91 (0.02) | 0.85 (0.01) | 1.24 (0.01) | 1.73 (0.01) | 0.70 (0.00) | 0.71 (0.01) | 1.15 (0.01) |
| MAXDIAG+GP(LL)   | 0.38 (0.01) | 0.49 (0.01) | 2.59 (0.06) | 0.14 (0.01)  | 0.12 (0.01)  | 0.98 (0.03) | 0.83 (0.01) | 1.22 (0.01) | 1.96 (0.07) | 0.51 (0.01) | 0.51 (0.01) | 1.17 (0.01) |
| MAXDIAG+GP(RP)   | 0.39 (0.01) | 0.49 (0.01) | 2.90 (0.15) | 0.15 (0.01)  | 0.13 (0.01)  | 0.98 (0.02) | 0.85 (0.02) | 1.25 (0.03) | 1.96 (0.05) | 0.59 (0.01) | 0.58 (0.01) | 1.18 (0.03) |
| MAXDET+GP(LL)    | 0.37 (0.01) | 0.48 (0.01) | 2.54 (0.06) | 0.13 (0.00)  | 0.11 (0.01)  | 0.95 (0.02) | 0.72 (0.01) | 1.03 (0.02) | 1.56 (0.04) | 0.38 (0.00) | 0.41 (0.01) | 0.99 (0.02) |
| MAXDET+GP(RP)    | 0.37 (0.01) | 0.48 (0.01) | 2.53 (0.09) | 0.13 (0.01)  | 0.11 (0.01)  | 0.95 (0.03) | 0.66 (0.01) | 0.94 (0.01) | 1.37 (0.02) | 0.43 (0.01) | 0.44 (0.01) | 0.91 (0.01) |
| MAXDIST+GP(LL)   | 0.36 (0.01) | 0.46 (0.01) | 2.51 (0.10) | 0.04 (0.00)  | 0.07 (0.00)  | 0.91 (0.03) | 0.63 (0.01) | 0.89 (0.02) | 1.42 (0.07) | 0.34 (0.02) | 0.41 (0.01) | 0.86 (0.02) |
| MAXDIST+GP(RP)   | 0.36 (0.01) | 0.46 (0.01) | 2.54 (0.06) | 0.05 (0.00)  | 0.08 (0.00)  | 0.91 (0.02) | 0.64 (0.01) | 0.89 (0.01) | 1.40 (0.02) | 0.39 (0.01) | 0.46 (0.01) | 0.86 (0.01) |
| MAXDIST+FEAT(LL) | 0.36 (0.01) | 0.46 (0.01) | 2.47 (0.10) | 0.03 (0.00)  | 0.05 (0.00)  | 0.91 (0.03) | 0.64 (0.01) | 0.89 (0.01) | 1.61 (0.07) | 0.29 (0.01) | 0.32 (0.01) | 0.88 (0.01) |
| MAXDIST+FEAT(RP) | 0.38 (0.01) | 0.48 (0.01) | 2.51 (0.08) | 0.02 (0.01)  | 0.05 (0.01)  | 0.95 (0.03) | 0.64 (0.01) | 0.90 (0.01) | 1.56 (0.03) | 0.25 (0.01) | 0.30 (0.01) | 0.88 (0.01) |
| LCMD+FEAT(LL)    | 0.36 (0.01) | 0.47 (0.01) | 2.89 (0.25) | 0.12 (0.01)  | 0.10 (0.00)  | 0.93 (0.02) | 0.65 (0.01) | 0.91 (0.01) | 1.96 (0.05) | 0.49 (0.02) | 0.47 (0.02) | 0.93 (0.01) |
| LCMD+FEAT(RP)    | 0.36 (0.00) | 0.47 (0.00) | 2.86 (0.14) | 0.09 (0.01)  | 0.09 (0.01)  | 0.93 (0.01) | 0.64 (0.01) | 0.91 (0.01) | 2.26 (0.24) | 0.43 (0.02) | 0.45 (0.01) | 0.93 (0.01) |

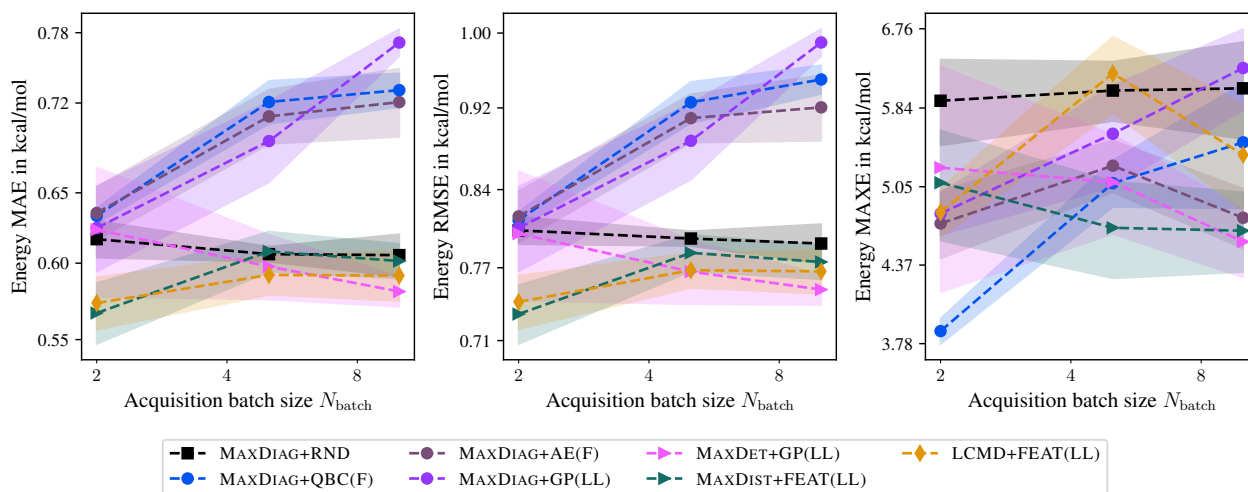

Figure 1 Dependence of the mean absolute errors (MAE), root-mean-square errors (RMSE), and maximum errors (MAXE) of the total energy on the acquired batch size  $N_{\text{batch}}$ . All errors are evaluated for the last BMDAL step on the aspirin molecule data from MD17.<sup>1-4</sup> All corresponding values are given for the  $(10, 100; \{2, 5, 10\})_{\text{MD17}}$  BMDAL experiments. Shaded areas denote the standard error on the mean evaluated over five independent runs.

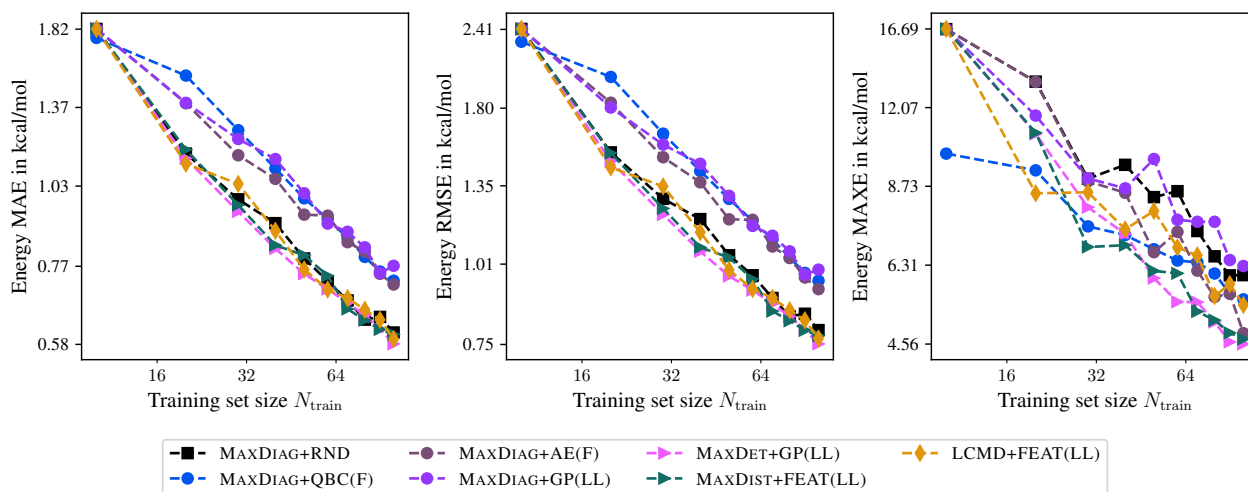

Figure 2 Learning curves for the aspirin molecule data from MD17.<sup>1-4</sup> The mean absolute errors (MAE), root-mean-square errors (RMSE), and maximum errors (MAXE) of the total energy are plotted against the training set size acquired during BMDAL. All corresponding values are given for the  $(10, 100; 10)_{\text{MD17}}$  BMDAL experiment. The training errors before the first BMDAL step are identical for most methods since they use the same random seed. This does not apply to QbC, where more models are trained.

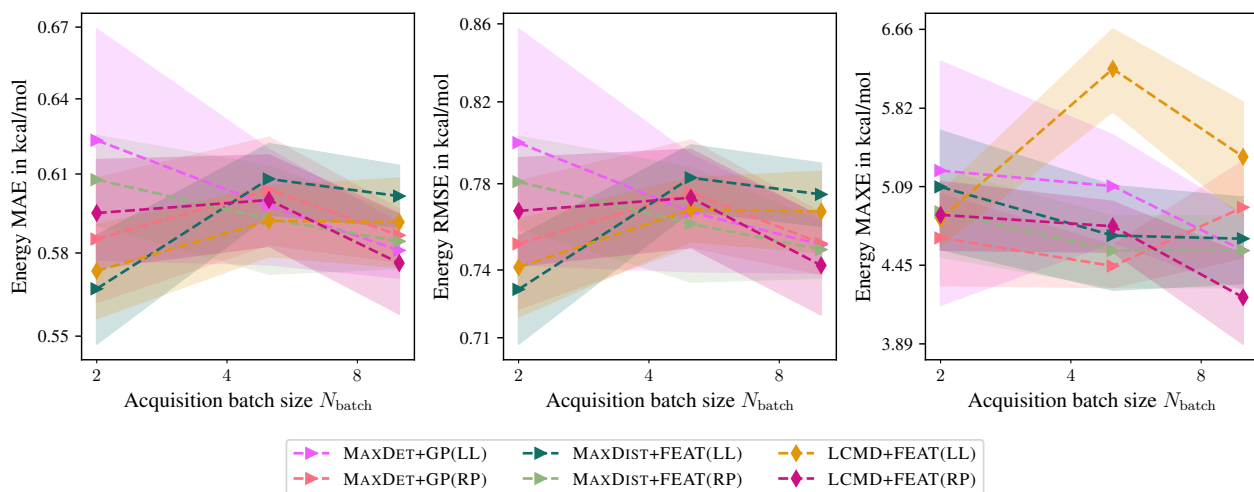

Figure 3 Comparison of the last layer and random projections gradient feature maps on the aspirin molecule data from MD17.<sup>1-4</sup> The mean absolute errors (MAE), root-mean-square errors (RMSE), and maximum errors (MAXE) of the total energy are plotted against the acquired batch size  $N_{\text{batch}}$ . All corresponding values are given for the  $(10, 100; \{2, 5, 10\})_{\text{MD17}}$  BMDAL experiments. Shaded areas denote the standard error on the mean evaluated over five independent runs.

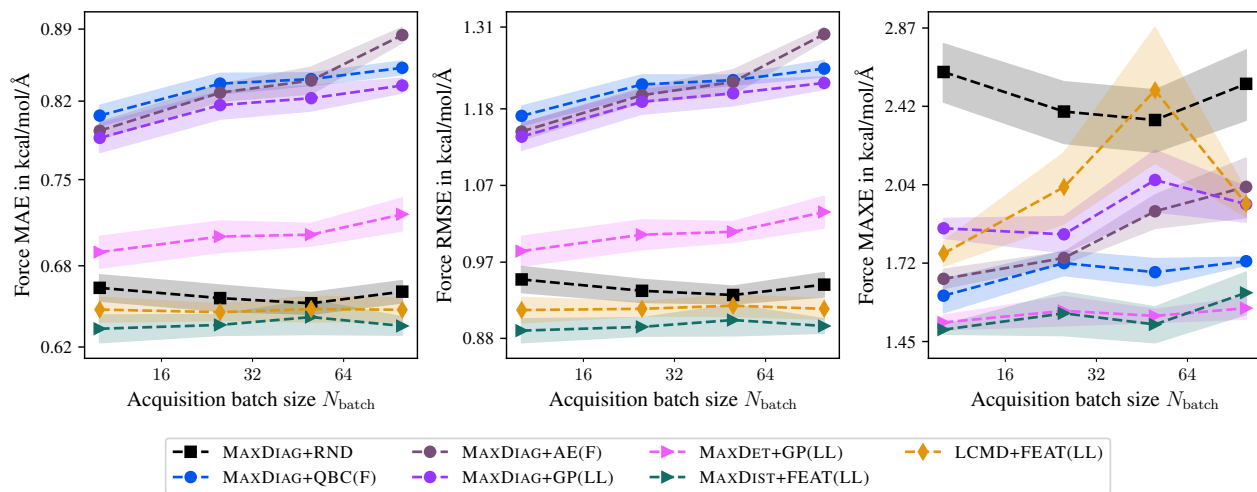

Figure 4 Dependence of the mean absolute errors (MAE), root-mean-square errors (RMSE), and maximum errors (MAXE) of atomic forces on the acquired batch size  $N_{\text{batch}}$ . All errors are evaluated for the last BMDAL step on the aspirin molecule data from MD17.<sup>1-4</sup> All corresponding values are given for the  $(100, 1000; \{10, 25, 50, 100\})_{\text{MD17}}$  BMDAL experiments. Shaded areas denote the standard error on the mean evaluated over five independent runs.

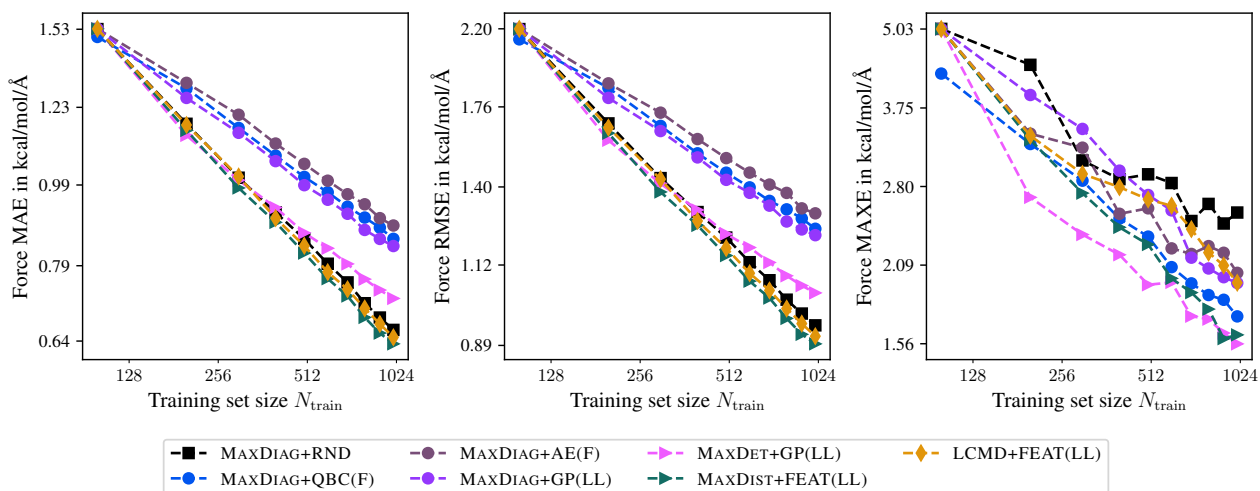

Figure 5 Learning curves for the aspirin molecule data from MD17.<sup>1-4</sup> The mean absolute errors (MAE), root-mean-square errors (RMSE), and maximum errors (MAXE) of atomic forces are plotted against the training set size acquired during BMDAL. All corresponding values are given for the  $(100, 1000; 100)_{\text{MD17}}$  BMDAL experiment. The training errors before the first BMDAL step are identical for most methods since they use the same random seed. This does not apply to QbC, where more models are trained.

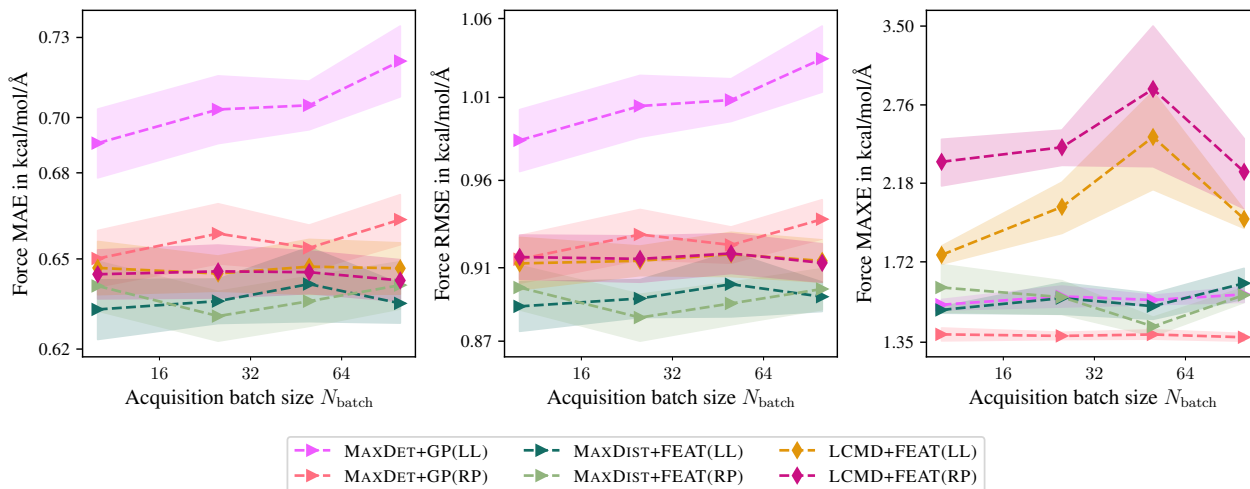

Figure 6 Comparison of the last layer and random projections gradient feature maps on the aspirin molecule data from MD17.<sup>1-4</sup> The mean absolute errors (MAE), root-mean-square errors (RMSE), and maximum errors (MAXE) of atomic forces are plotted against the acquired batch size  $N_{\text{batch}}$ . All corresponding values are given for the  $(100, 1000; \{10, 25, 50, 100\})_{\text{MD17}}$  BMDAL experiments. Shaded areas denote the standard error on the mean evaluated over five independent runs.



## 2 QM9

Here, additional results on the QM9 data set<sup>5-7</sup> are presented. Table 5 and Table 6 present the numerical values for the mean absolute error (MAE), root-mean-square error (RMSE), maximum error (MAXE), Pearson (PCC) and Spearman (SRC) correlation coefficients, as well as 95% quantile, evaluated on test data for total energies. While Table 5 provides with the errors averaged over the learning curve, Table 6 shows the performance of the final model. All results are given for the  $(1000, 10000; 250)_{\text{QM9}}$  BMDAL experiment. The respective results for  $(5000, 25000; 250)_{\text{QM9}}$  can be found in Table 7 and Table 8. Fig. 7 and Fig. 8 present the learning curves for the  $(5000, 25000; 250)_{\text{QM9}}$  experiment.

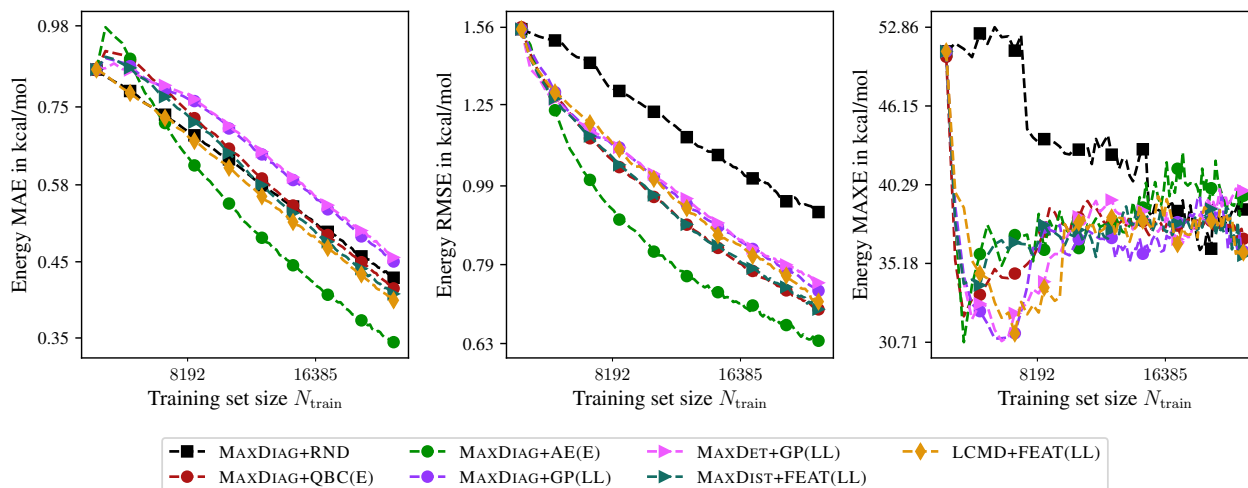

Figure 7 Learning curves for the QM9 data set.<sup>5-7</sup> The mean absolute errors (MAE), root-mean-square errors (RMSE), and maximum errors (MAXE) of the atomization energies are plotted against the training set size acquired during BMDAL. All corresponding values are given for the  $(5000, 25000; 250)_{\text{QM9}}$  BMDAL experiment. The markers show only a subset of all BMDAL steps for better visibility, while the lines use all steps. The training errors before the first BMDAL step are identical for most methods since they use the same random seed. This does not apply to QbC, where more models are trained.

Table 5 The mean absolute error (MAE), root-mean-square error (RMSE), maximum error (MAXE), Pearson (PCC) and Spearman (SRC) correlation coefficients for total energies evaluated on test data. All values are computed for (1000,10000;250)<sub>QM9</sub> as an average over AL steps. The energy errors are given in kcal/mol. All times are given in seconds. Standard errors on the mean are given in parentheses.

| Method           | Energy      |             |              |             |              | Time        |              |                |
|------------------|-------------|-------------|--------------|-------------|--------------|-------------|--------------|----------------|
|                  | MAE         | RMSE        | MAXE         | PCC         | SRC          | 95%         | Kernel       | Selection      |
| MAXDIAG+RND      | 0.91 (0.01) | 1.69 (0.04) | 60.88 (4.96) | 0.00 (0.00) | -0.00 (0.00) | 2.45 (0.03) | 0.01 (0.00)  | 0.02 (0.01)    |
| MAXDIAG+AE(E)    | 0.99 (0.02) | 1.38 (0.02) | 40.52 (3.71) | 1.00 (0.00) | 1.00 (0.00)  | 2.52 (0.04) | 25.88 (0.40) | 0.02 (0.00)    |
| MAXDIAG+QBC(E)   | 1.11 (0.01) | 1.53 (0.02) | 38.50 (2.82) | 0.28 (0.03) | 0.17 (0.01)  | 2.72 (0.03) | 45.78 (1.18) | 0.02 (0.00)    |
| MAXDIAG+GP(LL)   | 1.16 (0.01) | 1.60 (0.02) | 37.58 (2.00) | 0.22 (0.01) | 0.10 (0.01)  | 3.01 (0.04) | 28.04 (0.36) | 0.01 (0.00)    |
| MAXDIAG+GP(RP)   | 1.15 (0.01) | 1.60 (0.02) | 38.73 (2.53) | 0.25 (0.01) | 0.11 (0.01)  | 2.99 (0.04) | 40.00 (1.48) | 0.01 (0.00)    |
| MAXDET+GP(LL)    | 1.15 (0.01) | 1.58 (0.02) | 38.89 (2.28) | 0.24 (0.01) | 0.12 (0.01)  | 2.99 (0.03) | 28.43 (0.47) | 12.03 (0.37)   |
| MAXDET+GP(RP)    | 1.14 (0.01) | 1.57 (0.02) | 38.77 (2.52) | 0.25 (0.01) | 0.12 (0.01)  | 2.97 (0.03) | 38.75 (1.86) | 12.55 (1.47)   |
| MAXDIST+GP(LL)   | 1.07 (0.01) | 1.48 (0.01) | 39.12 (2.40) | 0.24 (0.01) | 0.10 (0.01)  | 2.75 (0.03) | 27.60 (0.34) | 175.37 (2.79)  |
| MAXDIST+GP(RP)   | 1.09 (0.01) | 1.50 (0.01) | 38.68 (2.51) | 0.25 (0.01) | 0.10 (0.01)  | 2.79 (0.03) | 39.77 (2.22) | 169.87 (9.91)  |
| MAXDIST+FEAT(LL) | 1.05 (0.01) | 1.49 (0.02) | 40.32 (3.12) | 0.14 (0.01) | 0.07 (0.01)  | 2.72 (0.03) | 33.32 (4.72) | 231.35 (45.52) |
| MAXDIST+FEAT(RP) | 1.05 (0.01) | 1.50 (0.01) | 40.91 (3.89) | 0.14 (0.02) | 0.07 (0.01)  | 2.74 (0.03) | 37.68 (0.65) | 162.21 (4.20)  |
| LCMD+FEAT(LL)    | 0.91 (0.01) | 1.44 (0.02) | 47.96 (6.88) | 0.29 (0.01) | 0.16 (0.00)  | 2.44 (0.03) | 27.35 (0.65) | 180.74 (4.93)  |
| LCMD+FEAT(RP)    | 0.91 (0.01) | 1.46 (0.03) | 55.52 (8.17) | 0.28 (0.01) | 0.16 (0.01)  | 2.42 (0.04) | 38.32 (1.03) | 172.90 (4.86)  |

Table 6 The mean absolute error (MAE), root-mean-square error (RMSE), maximum error (MAXE), Pearson (PCC) and Spearman (SRC) correlation coefficients for total energies evaluated on test data. All values are computed employing the final model obtained for the (1000,10000;250)<sub>QM9</sub> experiment. The energy errors are given in kcal/mol. Standard errors on the mean are given in parentheses.

| Method           | Energy      |             |              |             |             |             |  |
|------------------|-------------|-------------|--------------|-------------|-------------|-------------|--|
|                  | MAE         | RMSE        | MAXE         | PCC         | SRC         | 95%         |  |
| MAXDIAG+RND      | 0.64 (0.01) | 1.25 (0.02) | 62.77 (7.42) | 0.00 (0.00) | 0.00 (0.00) | 1.75 (0.03) |  |
| MAXDIAG+AE(E)    | 0.55 (0.01) | 0.83 (0.01) | 40.26 (4.51) | 1.00 (0.00) | 1.00 (0.00) | 1.35 (0.02) |  |
| MAXDIAG+QBC(E)   | 0.71 (0.01) | 1.01 (0.01) | 39.42 (3.25) | 0.40 (0.06) | 0.15 (0.01) | 1.70 (0.02) |  |
| MAXDIAG+GP(LL)   | 0.79 (0.00) | 1.11 (0.01) | 39.91 (1.85) | 0.23 (0.02) | 0.03 (0.00) | 2.03 (0.01) |  |
| MAXDIAG+GP(RP)   | 0.78 (0.01) | 1.10 (0.01) | 41.23 (2.66) | 0.28 (0.03) | 0.03 (0.00) | 1.98 (0.01) |  |
| MAXDET+GP(LL)    | 0.80 (0.00) | 1.12 (0.00) | 40.55 (2.69) | 0.22 (0.02) | 0.03 (0.01) | 2.04 (0.01) |  |
| MAXDET+GP(RP)    | 0.80 (0.01) | 1.11 (0.00) | 40.79 (3.02) | 0.26 (0.02) | 0.04 (0.01) | 2.02 (0.01) |  |
| MAXDIST+GP(LL)   | 0.70 (0.00) | 1.00 (0.00) | 39.73 (2.25) | 0.26 (0.01) | 0.06 (0.01) | 1.76 (0.01) |  |
| MAXDIST+GP(RP)   | 0.71 (0.01) | 1.01 (0.01) | 39.32 (3.51) | 0.31 (0.02) | 0.05 (0.01) | 1.78 (0.01) |  |
| MAXDIST+FEAT(LL) | 0.68 (0.01) | 1.00 (0.01) | 40.64 (3.14) | 0.18 (0.02) | 0.05 (0.00) | 1.73 (0.02) |  |
| MAXDIST+FEAT(RP) | 0.68 (0.00) | 1.00 (0.01) | 44.80 (4.54) | 0.18 (0.03) | 0.05 (0.00) | 1.72 (0.01) |  |
| LCMD+FEAT(LL)    | 0.62 (0.01) | 1.01 (0.01) | 40.67 (3.89) | 0.30 (0.02) | 0.16 (0.00) | 1.65 (0.01) |  |
| LCMD+FEAT(RP)    | 0.62 (0.01) | 1.02 (0.03) | 47.35 (6.63) | 0.31 (0.02) | 0.17 (0.00) | 1.64 (0.02) |  |

Table 7 The mean absolute error (MAE), root-mean-square error (RMSE), maximum error (MAXE), Pearson (PCC) and Spearman (SRC) correlation coefficients for total energies evaluated on test data. All values are computed for (5000, 25000; 250)<sub>QM9</sub> as an average over AL steps. The energy errors are given in kcal/mol. All times are given in seconds. Standard errors on the mean are given in parentheses.

| Method           | Energy      |             |              |             |              |             | Time         |                 |
|------------------|-------------|-------------|--------------|-------------|--------------|-------------|--------------|-----------------|
|                  | MAE         | RMSE        | MAXE         | PCC         | SRC          | 95%         | Kernel       | Selection       |
| MAXDIAG+RND      | 0.56 (0.01) | 1.12 (0.02) | 41.55 (3.59) | 0.00 (0.00) | -0.00 (0.00) | 1.54 (0.02) | 0.00 (0.00)  | 0.02 (0.00)     |
| MAXDIAG+AE(E)    | 0.49 (0.00) | 0.79 (0.03) | 38.72 (5.46) | 1.00 (0.00) | 1.00 (0.00)  | 1.25 (0.01) | 25.41 (0.61) | 0.02 (0.00)     |
| MAXDIAG+QBC(E)   | 0.58 (0.00) | 0.89 (0.02) | 37.34 (4.75) | 0.42 (0.03) | 0.24 (0.01)  | 1.40 (0.01) | 48.58 (1.02) | 0.02 (0.01)     |
| MAXDIAG+GP(LL)   | 0.61 (0.00) | 0.93 (0.02) | 36.65 (4.90) | 0.30 (0.01) | 0.12 (0.00)  | 1.60 (0.01) | 29.78 (0.57) | 0.01 (0.00)     |
| MAXDIAG+GP(RP)   | 0.61 (0.00) | 0.92 (0.02) | 37.71 (5.25) | 0.33 (0.01) | 0.12 (0.00)  | 1.58 (0.01) | 38.58 (0.50) | 0.01 (0.00)     |
| MAXDET+GP(LL)    | 0.62 (0.00) | 0.94 (0.02) | 37.38 (4.59) | 0.30 (0.01) | 0.12 (0.00)  | 1.61 (0.01) | 30.59 (0.82) | 12.70 (1.17)    |
| MAXDET+GP(RP)    | 0.61 (0.00) | 0.93 (0.02) | 38.02 (4.89) | 0.34 (0.01) | 0.13 (0.00)  | 1.60 (0.01) | 38.80 (0.57) | 10.29 (0.29)    |
| MAXDIST+GP(LL)   | 0.57 (0.00) | 0.89 (0.02) | 38.98 (4.87) | 0.37 (0.02) | 0.14 (0.00)  | 1.49 (0.01) | 30.07 (0.76) | 540.91 (28.03)  |
| MAXDIST+GP(RP)   | 0.57 (0.00) | 0.89 (0.02) | 40.35 (5.42) | 0.39 (0.02) | 0.14 (0.00)  | 1.48 (0.01) | 39.31 (0.57) | 456.22 (10.12)  |
| MAXDIST+FEAT(LL) | 0.56 (0.00) | 0.89 (0.02) | 37.32 (4.65) | 0.23 (0.01) | 0.10 (0.00)  | 1.47 (0.01) | 30.98 (1.13) | 580.00 (37.60)  |
| MAXDIST+FEAT(RP) | 0.56 (0.00) | 0.88 (0.02) | 38.11 (4.61) | 0.23 (0.01) | 0.10 (0.00)  | 1.47 (0.01) | 40.20 (0.70) | 484.96 (23.72)  |
| LCMD+FEAT(LL)    | 0.54 (0.00) | 0.92 (0.03) | 36.95 (6.30) | 0.30 (0.01) | 0.17 (0.01)  | 1.44 (0.01) | 35.06 (4.23) | 695.98 (114.62) |
| LCMD+FEAT(RP)    | 0.54 (0.01) | 0.92 (0.02) | 37.78 (4.63) | 0.30 (0.00) | 0.18 (0.00)  | 1.44 (0.02) | 47.81 (5.30) | 695.31 (137.75) |

Table 8 The mean absolute error (MAE), root-mean-square error (RMSE), maximum error (MAXE), Pearson (PCC) and Spearman (SRC) correlation coefficients for total energies evaluated on test data. All values are computed employing the final model obtained for the (5000,25000;250)<sub>QM9</sub> experiment. The energy errors are given in kcal/mol. Standard errors on the mean are given in parentheses.

| Method           | Energy       |              |               |               |               |              |
|------------------|--------------|--------------|---------------|---------------|---------------|--------------|
|                  | MAE          | RMSE         | MAXE          | PCC           | SRC           | 95%          |
| MAXDIAG+RND      | 0.43 ( 0.01) | 0.92 ( 0.02) | 38.61 ( 5.42) | -0.00 ( 0.00) | -0.00 ( 0.00) | 1.18 ( 0.01) |
| MAXDIAG+AE(E)    | 0.35 ( 0.00) | 0.64 ( 0.03) | 39.53 ( 5.49) | 1.00 ( 0.00)  | 1.00 ( 0.00)  | 0.87 ( 0.01) |
| MAXDIAG+QBC(E)   | 0.41 ( 0.00) | 0.69 ( 0.02) | 36.71 ( 4.81) | 0.51 ( 0.04)  | 0.23 ( 0.01)  | 0.97 ( 0.01) |
| MAXDIAG+GP(LL)   | 0.45 ( 0.00) | 0.73 ( 0.02) | 35.92 ( 4.71) | 0.30 ( 0.02)  | 0.02 ( 0.00)  | 1.17 ( 0.00) |
| MAXDIAG+GP(RP)   | 0.45 ( 0.00) | 0.72 ( 0.02) | 38.00 ( 4.84) | 0.35 ( 0.02)  | 0.05 ( 0.01)  | 1.15 ( 0.01) |
| MAXDET+GP(LL)    | 0.46 ( 0.00) | 0.75 ( 0.02) | 39.88 ( 4.87) | 0.31 ( 0.01)  | 0.02 ( 0.01)  | 1.18 ( 0.01) |
| MAXDET+GP(RP)    | 0.45 ( 0.00) | 0.73 ( 0.02) | 37.12 ( 4.82) | 0.36 ( 0.02)  | 0.05 ( 0.01)  | 1.15 ( 0.01) |
| MAXDIST+GP(LL)   | 0.41 ( 0.00) | 0.70 ( 0.02) | 37.93 ( 4.28) | 0.43 ( 0.02)  | 0.08 ( 0.00)  | 1.05 ( 0.01) |
| MAXDIST+GP(RP)   | 0.41 ( 0.00) | 0.70 ( 0.03) | 39.17 ( 5.31) | 0.46 ( 0.02)  | 0.09 ( 0.00)  | 1.04 ( 0.01) |
| MAXDIST+FEAT(LL) | 0.40 ( 0.00) | 0.70 ( 0.02) | 35.67 ( 4.53) | 0.28 ( 0.01)  | 0.07 ( 0.00)  | 1.05 ( 0.01) |
| MAXDIST+FEAT(RP) | 0.40 ( 0.00) | 0.69 ( 0.02) | 38.31 ( 4.94) | 0.29 ( 0.01)  | 0.08 ( 0.00)  | 1.03 ( 0.01) |
| LCMD+FEAT(LL)    | 0.40 ( 0.00) | 0.71 ( 0.03) | 35.85 ( 5.17) | 0.31 ( 0.01)  | 0.15 ( 0.00)  | 1.05 ( 0.00) |
| LCMD+FEAT(RP)    | 0.40 ( 0.00) | 0.73 ( 0.04) | 39.83 ( 6.90) | 0.32 ( 0.00)  | 0.17 ( 0.00)  | 1.06 ( 0.01) |

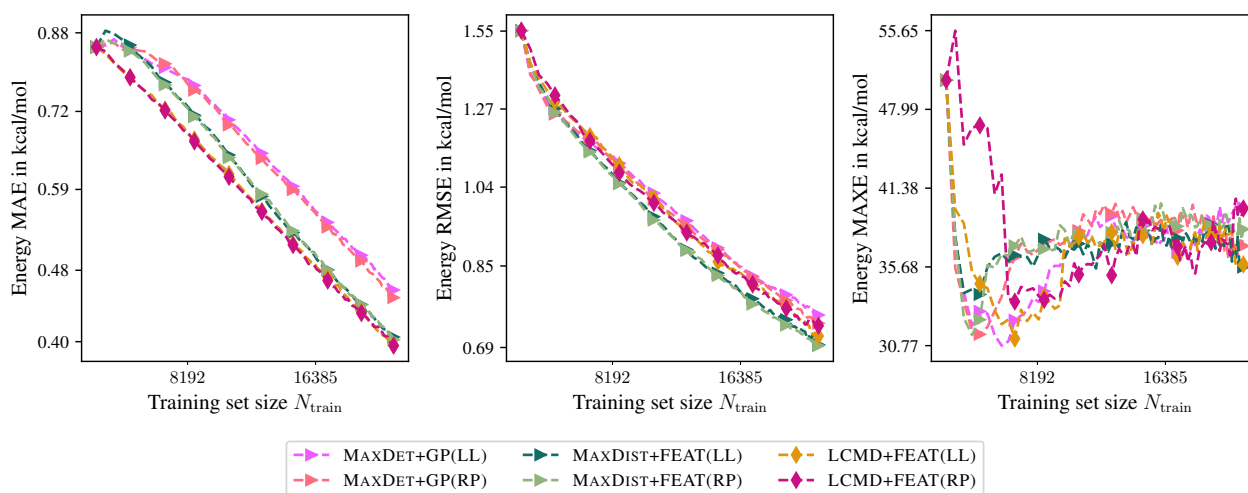

Figure 8 Comparison of the last layer and random projections gradient feature maps on the QM9 data set.<sup>5-7</sup> The mean absolute errors (MAE), root-mean-square errors (RMSE), and maximum errors (MAXE) of the atomization energies are plotted against the training set size acquired during BMDAL. All corresponding values are given for the  $(5000, 25000; 250)_{\text{QM9}}$  BMDAL experiment. The markers show only a subset of all BMDAL steps for better visibility, while the lines use all steps. The training errors before the first BMDAL step are identical for most methods since they use the same random seed. This does not apply to QbC, where more models are trained.

### 3 TiO<sub>2</sub>

Here, additional results on the TiO<sub>2</sub> data set<sup>8,9</sup> are presented. Table 9 and Table 10 present the numerical values for the mean absolute error (MAE), root-mean-square error (RMSE), maximum error (MAXE), Pearson (PCC) and Spearman (SRC) correlation coefficients, as well as 95% quantile, evaluated on test data for total energies and forces. While Table 9 provides with the errors averaged over the learning curve, Table 10 shows the performance of the final model. All results are given for the (10, 250; 10)<sub>TiO<sub>2</sub></sub> BMDAL experiment. The respective results for (500, 2500; 250)<sub>TiO<sub>2</sub></sub> can be found in Table 11 and Table 12.

Fig. 9, Fig. 10, and Fig. 11 complement the results obtained in the main manuscript on atomic forces with the results for the total energy. Fig. 12, Fig. 13, and Fig. 14 present the batch size dependence and the learning curves for (500, 2500; {50, 100, 250})<sub>TiO<sub>2</sub></sub> or (500, 2500; 250)<sub>TiO<sub>2</sub></sub>, respectively.

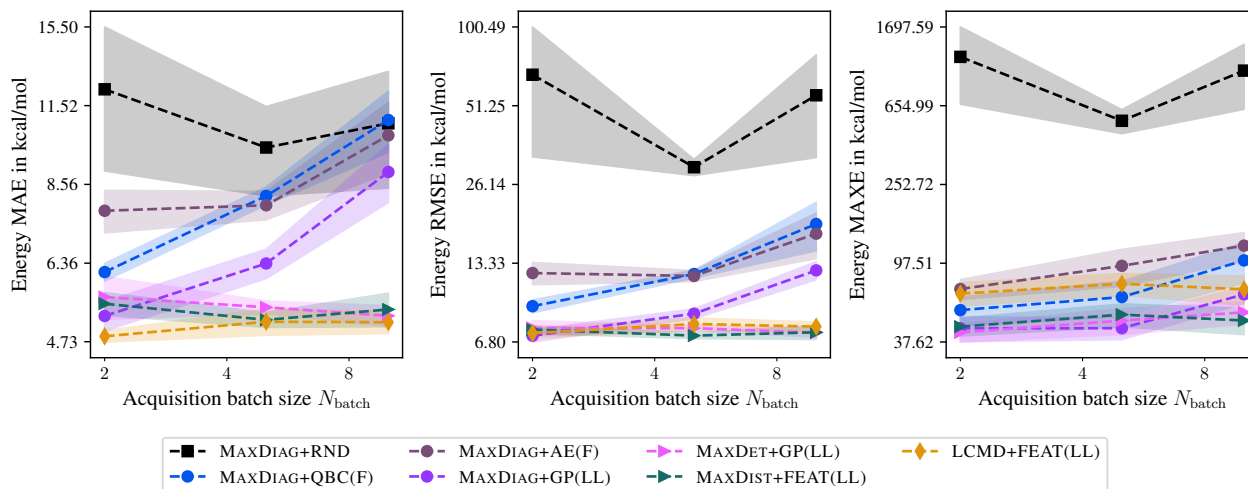

Figure 9 Dependence of the mean absolute errors (MAE), root-mean-square errors (RMSE), and maximum errors (MAXE) of the total energy on the acquired batch size  $N_{\text{batch}}$ . All errors are evaluated for the last BMDAL step on the TiO<sub>2</sub> data set.<sup>8,9</sup> All corresponding values are given for the (10, 250; {2, 5, 10})<sub>TiO<sub>2</sub></sub> BMDAL experiments. Shaded areas denote the standard error on the mean evaluated over five independent runs.

Table 9 The mean absolute error (MAE), root-mean-square error (RMSE), maximum error (MAXE), Pearson (PCC) and Spearman (SRC) correlation coefficients for total energies and atomic forces evaluated on test data. All values are computed for (10,250;10)<sub>TiO<sub>2</sub></sub> as an average over AL steps. The energy errors are given in kcal/mol, while the force errors are in kcal/mol/Å. All times are given in seconds. Standard errors on the mean are given in parentheses.

| Method           | Energy        |                |                  |              |             | Force          |             |              |                |              | Time         |              |               |             |
|------------------|---------------|----------------|------------------|--------------|-------------|----------------|-------------|--------------|----------------|--------------|--------------|--------------|---------------|-------------|
|                  | MAE           | RMSE           | MAXE             | PCC          | SRC         | 95%            | MAE         | RMSE         | MAXE           | PCC          | SRC          | 95%          | Kernel        | Selection   |
| MaxDiag+RND      | 25.49 (3.69)  | 109.70 (26.01) | 1687.74 (426.35) | -0.01 (0.01) | 0.00 (0.01) | 92.09 (12.59)  | 6.08 (0.41) | 35.68 (6.93) | 360.23 (66.47) | -0.01 (0.01) | -0.01 (0.01) | 15.57 (1.32) | 0.00 (0.00)   | 0.00 (0.00) |
| MaxDiag+AE(E)    | 32.50 (7.43)  | 54.45 (11.05)  | 400.36 (69.10)   | 1.00 (0.00)  | 1.00 (0.00) | 107.93 (23.55) | 7.22 (0.65) | 14.76 (1.75) | 103.62 (18.02) | 0.34 (0.04)  | 0.30 (0.04)  | 15.62 (1.30) | 15.79 (2.01)  | 0.01 (0.01) |
| MaxDiag+AE(F)    | 45.84 (8.51)  | 89.50 (15.77)  | 777.08 (182.93)  | 0.30 (0.04)  | 0.32 (0.05) | 173.19 (33.82) | 8.17 (0.44) | 15.07 (1.16) | 85.93 (13.18)  | 1.00 (0.00)  | 1.00 (0.00)  | 16.45 (0.98) | 18.37 (4.05)  | 0.00 (0.00) |
| MaxDiag+QBC(E)   | 42.65 (8.43)  | 70.68 (11.82)  | 454.54 (63.86)   | 0.52 (0.07)  | 0.63 (0.05) | 130.98 (27.46) | 7.45 (0.32) | 16.54 (1.08) | 133.13 (13.68) | 0.30 (0.05)  | 0.33 (0.05)  | 15.44 (0.67) | 33.81 (0.69)  | 0.00 (0.00) |
| MaxDiag+QBC(F)   | 47.79 (7.00)  | 91.47 (14.62)  | 676.32 (146.42)  | 0.22 (0.05)  | 0.40 (0.04) | 177.38 (36.72) | 8.07 (0.25) | 14.76 (0.83) | 86.69 (12.00)  | 0.73 (0.03)  | 0.84 (0.02)  | 15.83 (0.77) | 37.43 (0.40)  | 0.00 (0.00) |
| MaxDiag+GP(LL)   | 90.74 (26.09) | 139.23 (38.49) | 724.86 (177.08)  | 0.31 (0.05)  | 0.44 (0.05) | 288.28 (87.02) | 7.66 (0.55) | 16.47 (1.49) | 130.15 (18.58) | 0.48 (0.05)  | 0.55 (0.03)  | 16.89 (1.16) | 7.09 (0.14)   | 0.00 (0.00) |
| MaxDiag+GP(RP)   | 76.63 (22.47) | 118.28 (33.41) | 657.21 (157.42)  | 0.32 (0.05)  | 0.45 (0.04) | 240.68 (73.60) | 7.57 (0.46) | 16.78 (1.40) | 137.10 (20.94) | 0.46 (0.04)  | 0.53 (0.03)  | 17.37 (0.99) | 8.69 (0.14)   | 0.00 (0.00) |
| MaxDET+GP(LL)    | 32.98 (6.91)  | 53.56 (10.28)  | 337.58 (57.94)   | 0.26 (0.03)  | 0.38 (0.03) | 106.66 (21.71) | 5.35 (0.24) | 11.15 (1.00) | 82.02 (14.27)  | 0.54 (0.04)  | 0.34 (0.03)  | 11.33 (0.50) | 7.58 (0.45)   | 0.04 (0.00) |
| MaxDET+GP(RP)    | 32.07 (6.70)  | 52.47 (9.86)   | 323.57 (50.24)   | 0.27 (0.04)  | 0.39 (0.03) | 105.54 (21.76) | 5.37 (0.27) | 11.09 (1.04) | 79.57 (14.23)  | 0.54 (0.04)  | 0.31 (0.02)  | 11.27 (0.50) | 9.14 (0.22)   | 0.04 (0.00) |
| MaxDist+GP(LL)   | 30.46 (5.78)  | 51.03 (9.00)   | 368.66 (69.51)   | 0.18 (0.05)  | 0.18 (0.04) | 99.07 (17.72)  | 5.20 (0.26) | 11.20 (1.17) | 84.86 (16.19)  | 0.58 (0.04)  | 0.42 (0.05)  | 10.94 (0.51) | 8.39 (0.83)   | 0.48 (0.09) |
| MaxDist+GP(RP)   | 28.88 (5.95)  | 48.94 (8.33)   | 333.94 (42.94)   | 0.16 (0.05)  | 0.17 (0.05) | 94.06 (18.45)  | 5.16 (0.23) | 11.35 (1.08) | 89.06 (15.35)  | 0.59 (0.04)  | 0.43 (0.06)  | 10.83 (0.47) | 10.02 (0.23)  | 0.43 (0.03) |
| MaxDist+FEAT(LL) | 30.55 (6.46)  | 52.60 (10.12)  | 405.80 (63.28)   | 0.18 (0.06)  | 0.16 (0.06) | 101.15 (20.89) | 5.55 (0.30) | 12.64 (1.15) | 100.52 (14.20) | 0.34 (0.06)  | 0.24 (0.05)  | 12.06 (0.68) | 8.07 (0.44)   | 0.44 (0.04) |
| MaxDist+FEAT(RP) | 28.33 (6.27)  | 50.95 (10.61)  | 399.13 (67.16)   | 0.17 (0.06)  | 0.14 (0.05) | 102.26 (25.45) | 5.47 (0.30) | 12.52 (1.19) | 99.20 (15.90)  | 0.33 (0.05)  | 0.24 (0.05)  | 12.01 (0.56) | 11.65 (0.87)  | 0.53 (0.07) |
| LCMD+FEAT(LL)    | 16.18 (2.24)  | 34.50 (5.39)   | 372.09 (68.08)   | 0.37 (0.04)  | 0.28 (0.04) | 60.95 (10.60)  | 4.97 (0.28) | 13.24 (1.30) | 119.18 (17.42) | 0.49 (0.06)  | 0.18 (0.03)  | 10.80 (0.60) | 7.44 (0.36)   | 0.43 (0.03) |
| LCMD+FEAT(RP)    | 17.02 (2.63)  | 36.05 (5.10)   | 399.53 (71.21)   | 0.37 (0.04)  | 0.25 (0.03) | 62.21 (12.21)  | 5.00 (0.27) | 13.63 (1.42) | 127.16 (22.02) | 0.45 (0.06)  | 0.18 (0.04)  | 10.98 (0.63) | 29.22 (19.49) | 0.79 (0.35) |



Table 10 The mean absolute error (MAE), root-mean-square error (RMSE), maximum error (MAXE), Pearson (PCC) and Spearman (SRC) correlation coefficients for total energies and atomic forces evaluated on test data. All values are computed employing the final model obtained for the (10,250;10) $\text{TiO}_2$  experiment. The energy errors are given in kcal/mol, while the force errors are in kcal/mol/Å. Standard errors on the mean are given in parentheses.

| Method           | Energy       |               |                  |              |              | Force        |             |              |                |              |              |             |
|------------------|--------------|---------------|------------------|--------------|--------------|--------------|-------------|--------------|----------------|--------------|--------------|-------------|
|                  | MAE          | RMSE          | MAXE             | PCC          | SRC          | 95%          | MAE         | RMSE         | MAXE           | PCC          | SRC          | 95%         |
| MAXDIAG+RND      | 10.77 (2.33) | 56.04 (23.13) | 1001.04 (373.47) | -0.02 (0.01) | -0.00 (0.01) | 25.52 (3.65) | 3.81 (0.36) | 24.68 (7.17) | 219.66 (48.89) | -0.01 (0.01) | -0.01 (0.01) | 7.04 (0.31) |
| MAXDIAG+AE(E)    | 6.87 (0.43)  | 9.34 (0.44)   | 46.81 (7.65)     | 1.00 (0.00)  | 1.00 (0.00)  | 19.79 (0.81) | 3.78 (0.14) | 6.43 (0.37)  | 41.81 (4.51)   | 0.25 (0.03)  | 0.16 (0.05)  | 7.06 (0.26) |
| MAXDIAG+AE(F)    | 10.30 (1.36) | 17.16 (3.29)  | 120.57 (20.60)   | 0.12 (0.02)  | 0.11 (0.04)  | 35.37 (7.27) | 4.10 (0.08) | 6.30 (0.19)  | 33.74 (5.10)   | 1.00 (0.00)  | 1.00 (0.00)  | 6.40 (0.11) |
| MAXDIAG+QBC(E)   | 8.74 (0.79)  | 11.76 (1.08)  | 57.98 (7.01)     | 0.46 (0.04)  | 0.48 (0.04)  | 21.27 (2.59) | 4.07 (0.06) | 7.00 (0.22)  | 44.58 (4.01)   | 0.21 (0.04)  | 0.11 (0.05)  | 7.91 (0.22) |
| MAXDIAG+QBC(F)   | 10.91 (1.25) | 18.64 (3.80)  | 100.88 (24.30)   | 0.12 (0.03)  | 0.20 (0.02)  | 36.27 (9.16) | 4.32 (0.13) | 6.62 (0.24)  | 33.65 (4.20)   | 0.74 (0.02)  | 0.84 (0.02)  | 6.91 (0.32) |
| MAXDIAG+GP(LL)   | 8.97 (0.98)  | 12.54 (0.95)  | 66.93 (6.93)     | 0.24 (0.03)  | 0.38 (0.04)  | 25.46 (2.50) | 3.59 (0.06) | 6.16 (0.15)  | 41.00 (2.04)   | 0.58 (0.04)  | 0.49 (0.01)  | 6.93 (0.19) |
| MAXDIAG+GP(RP)   | 10.77 (1.39) | 14.41 (1.53)  | 71.04 (5.92)     | 0.24 (0.02)  | 0.38 (0.03)  | 29.28 (2.70) | 3.69 (0.03) | 6.39 (0.20)  | 42.72 (3.72)   | 0.58 (0.03)  | 0.48 (0.04)  | 7.31 (0.19) |
| MAXDET+GP(LL)    | 5.21 (0.20)  | 7.36 (0.27)   | 53.84 (7.21)     | 0.30 (0.03)  | 0.29 (0.02)  | 15.06 (0.35) | 2.86 (0.04) | 5.10 (0.24)  | 36.96 (5.83)   | 0.65 (0.07)  | 0.10 (0.02)  | 5.28 (0.12) |
| MAXDET+GP(RP)    | 5.59 (0.18)  | 7.73 (0.28)   | 45.56 (7.78)     | 0.25 (0.05)  | 0.32 (0.02)  | 16.15 (0.76) | 2.88 (0.06) | 4.92 (0.18)  | 33.55 (4.00)   | 0.66 (0.03)  | 0.10 (0.02)  | 5.32 (0.06) |
| MAXDIST+GP(LL)   | 4.89 (0.18)  | 7.02 (0.24)   | 44.24 (9.09)     | 0.15 (0.02)  | 0.05 (0.03)  | 14.76 (0.41) | 2.67 (0.02) | 4.78 (0.23)  | 34.77 (5.14)   | 0.71 (0.04)  | 0.38 (0.05)  | 4.83 (0.02) |
| MAXDIST+GP(RP)   | 5.21 (0.22)  | 7.40 (0.31)   | 43.83 (3.02)     | 0.15 (0.05)  | 0.01 (0.04)  | 15.75 (0.62) | 2.69 (0.02) | 4.72 (0.15)  | 36.06 (3.78)   | 0.77 (0.03)  | 0.38 (0.04)  | 4.76 (0.05) |
| MAXDIST+FEAT(LL) | 5.34 (0.34)  | 7.39 (0.44)   | 48.75 (7.64)     | 0.23 (0.03)  | 0.15 (0.02)  | 15.06 (0.97) | 3.00 (0.06) | 5.26 (0.13)  | 35.66 (2.89)   | 0.53 (0.05)  | 0.23 (0.00)  | 6.02 (0.14) |
| MAXDIST+FEAT(RP) | 5.79 (0.58)  | 8.15 (0.91)   | 48.10 (9.02)     | 0.20 (0.06)  | 0.10 (0.04)  | 18.12 (2.56) | 3.07 (0.10) | 5.38 (0.24)  | 35.07 (4.22)   | 0.49 (0.05)  | 0.23 (0.01)  | 6.15 (0.14) |
| LCMD+FEAT(LL)    | 5.09 (0.21)  | 7.75 (0.31)   | 71.09 (12.35)    | 0.42 (0.03)  | 0.25 (0.03)  | 15.10 (0.41) | 2.80 (0.04) | 6.11 (0.27)  | 51.81 (5.18)   | 0.52 (0.05)  | 0.10 (0.02)  | 5.54 (0.20) |
| LCMD+FEAT(RP)    | 4.75 (0.24)  | 7.43 (0.24)   | 85.70 (13.10)    | 0.42 (0.03)  | 0.26 (0.02)  | 14.00 (0.55) | 2.77 (0.07) | 6.19 (0.26)  | 51.92 (4.60)   | 0.52 (0.06)  | 0.13 (0.02)  | 5.56 (0.08) |

Table 11 The mean absolute error (MAE), root-mean-square error (RMSE), maximum error (MAXE), Pearson (PCC) and Spearman (SRC) correlation coefficients for total energies and atomic forces evaluated on test data. All values are computed for (500,2500;250)TiO<sub>2</sub> as an average over AL steps. The energy errors are given in kcal/mol, while the force errors are in kcal/mol/Å. All times are given in seconds. Standard errors on the mean are given in parentheses.

| Method           | Energy      |              |                |              |              | Force       |             |             |               |              | Time         |             |               |               |
|------------------|-------------|--------------|----------------|--------------|--------------|-------------|-------------|-------------|---------------|--------------|--------------|-------------|---------------|---------------|
|                  | MAE         | RMSE         | MAXE           | PCC          | SRC          | 95%         | MAE         | RMSE        | MAXE          | PCC          | SRC          | 95%         | Kernel        | Selection     |
| MaxDiag+RND      | 3.08 (0.17) | 11.96 (1.96) | 228.33 (53.46) | -0.00 (0.01) | -0.01 (0.02) | 7.76 (0.44) | 1.96 (0.06) | 9.44 (1.48) | 97.07 (21.34) | -0.01 (0.02) | -0.01 (0.03) | 4.06 (0.11) | 0.00 (0.00)   | 0.00 (0.00)   |
| MaxDiag+AE(E)    | 2.58 (0.10) | 6.07 (0.43)  | 101.41 (18.99) | 1.00 (0.00)  | 1.00 (0.00)  | 6.98 (0.27) | 1.90 (0.04) | 5.40 (0.49) | 49.15 (7.04)  | 0.61 (0.06)  | 0.09 (0.03)  | 4.08 (0.07) | 12.70 (1.09)  | 0.00 (0.00)   |
| MaxDiag+AE(F)    | 3.04 (0.11) | 6.85 (0.42)  | 104.58 (19.85) | 0.44 (0.07)  | -0.03 (0.02) | 9.37 (0.55) | 1.80 (0.03) | 5.18 (0.46) | 48.33 (7.16)  | 1.00 (0.00)  | 1.00 (0.00)  | 3.44 (0.08) | 13.80 (1.26)  | 0.00 (0.00)   |
| MaxDiag+QBC(E)   | 2.58 (0.09) | 5.80 (0.34)  | 89.25 (16.40)  | 0.64 (0.05)  | 0.64 (0.02)  | 6.37 (0.33) | 1.92 (0.04) | 5.42 (0.44) | 47.87 (6.48)  | 0.55 (0.04)  | -0.01 (0.03) | 4.13 (0.07) | 31.22 (0.41)  | 0.00 (0.00)   |
| MaxDiag+QBC(F)   | 2.81 (0.11) | 6.18 (0.32)  | 88.99 (15.73)  | 0.59 (0.05)  | 0.06 (0.02)  | 7.69 (0.49) | 1.78 (0.04) | 5.15 (0.40) | 46.68 (5.81)  | 0.88 (0.01)  | 0.90 (0.01)  | 3.47 (0.07) | 31.06 (0.67)  | 0.00 (0.00)   |
| MaxDiag+GP(LL)   | 2.86 (0.13) | 6.38 (0.45)  | 100.10 (18.36) | 0.54 (0.07)  | 0.33 (0.03)  | 8.22 (0.45) | 1.86 (0.04) | 5.35 (0.48) | 48.72 (6.86)  | 0.82 (0.03)  | 0.24 (0.02)  | 3.83 (0.09) | 7.25 (0.07)   | 0.00 (0.00)   |
| MaxDiag+GP(RP)   | 2.72 (0.11) | 6.18 (0.42)  | 98.01 (17.59)  | 0.52 (0.07)  | 0.35 (0.03)  | 7.95 (0.38) | 1.85 (0.04) | 5.32 (0.46) | 48.68 (6.60)  | 0.83 (0.02)  | 0.26 (0.02)  | 3.82 (0.08) | 10.00 (0.65)  | 0.00 (0.00)   |
| MaxDef+GP(LL)    | 2.60 (0.10) | 6.11 (0.41)  | 100.84 (19.84) | 0.58 (0.06)  | 0.42 (0.02)  | 7.42 (0.36) | 1.74 (0.03) | 5.30 (0.53) | 49.78 (7.38)  | 0.82 (0.02)  | 0.08 (0.02)  | 3.50 (0.06) | 8.26 (0.34)   | 1.93 (0.06)   |
| MaxDef+GP(RP)    | 2.51 (0.11) | 5.92 (0.42)  | 98.75 (18.11)  | 0.59 (0.05)  | 0.41 (0.02)  | 7.11 (0.34) | 1.72 (0.03) | 5.26 (0.50) | 48.85 (7.06)  | 0.83 (0.02)  | 0.10 (0.02)  | 3.50 (0.05) | 9.41 (0.14)   | 1.77 (0.04)   |
| MaxDist+GP(LL)   | 2.68 (0.13) | 6.28 (0.43)  | 101.66 (20.13) | 0.49 (0.08)  | 0.01 (0.02)  | 8.04 (0.46) | 1.69 (0.03) | 5.16 (0.42) | 48.66 (6.19)  | 0.85 (0.02)  | 0.62 (0.01)  | 3.39 (0.05) | 8.12 (0.19)   | 5.64 (0.24)   |
| MaxDist+GP(RP)   | 2.63 (0.11) | 6.18 (0.43)  | 100.73 (19.39) | 0.52 (0.07)  | 0.03 (0.02)  | 7.83 (0.46) | 1.69 (0.03) | 5.18 (0.45) | 48.63 (6.53)  | 0.87 (0.02)  | 0.61 (0.01)  | 3.40 (0.06) | 13.12 (1.44)  | 8.15 (1.35)   |
| MaxDist+FEAT(LL) | 2.64 (0.09) | 6.11 (0.42)  | 99.59 (19.17)  | 0.47 (0.06)  | 0.17 (0.02)  | 7.53 (0.37) | 1.76 (0.02) | 5.23 (0.46) | 48.32 (6.56)  | 0.75 (0.03)  | 0.32 (0.02)  | 3.66 (0.06) | 11.39 (2.12)  | 7.14 (0.45)   |
| MaxDist+FEAT(RP) | 2.61 (0.10) | 6.10 (0.42)  | 99.61 (18.56)  | 0.49 (0.07)  | 0.16 (0.02)  | 7.42 (0.32) | 1.74 (0.03) | 5.22 (0.47) | 48.38 (6.84)  | 0.78 (0.02)  | 0.33 (0.02)  | 3.65 (0.07) | 12.57 (0.74)  | 7.80 (1.55)   |
| LCMD+FEAT(LL)    | 2.57 (0.12) | 6.12 (0.39)  | 101.17 (18.94) | 0.50 (0.06)  | 0.21 (0.03)  | 7.38 (0.40) | 1.71 (0.03) | 5.23 (0.44) | 49.26 (6.49)  | 0.75 (0.03)  | 0.30 (0.02)  | 3.65 (0.06) | 38.58 (28.39) | 42.56 (35.25) |
| LCMD+FEAT(RP)    | 2.56 (0.15) | 6.09 (0.50)  | 101.36 (21.09) | 0.51 (0.07)  | 0.20 (0.03)  | 7.28 (0.41) | 1.71 (0.03) | 5.25 (0.47) | 48.68 (6.93)  | 0.78 (0.02)  | 0.30 (0.02)  | 3.65 (0.06) | 12.91 (2.27)  | 6.49 (0.34)   |

Table 12 The mean absolute error (MAE), root-mean-square error (RMSE), maximum error (MAXE), Pearson (PCC) and Spearman (SRC) correlation coefficients for total energies and atomic forces evaluated on test data. All values are computed employing the final model obtained for the (500,2500;250)<sub>TiO<sub>2</sub></sub> experiment. The energy errors are given in kcal/mol, while the force errors are in kcal/mol/Å. Standard errors on the mean are given in parentheses.

| Method           | Energy      |             |                |              |              |             | Force       |              |                |              |              |             |
|------------------|-------------|-------------|----------------|--------------|--------------|-------------|-------------|--------------|----------------|--------------|--------------|-------------|
|                  | MAE         | RMSE        | MAXE           | PCC          | SRC          | 95%         | MAE         | RMSE         | MAXE           | PCC          | SRC          | 95%         |
| MAXDIAG+RND      | 1.94 (0.16) | 8.25 (2.59) | 178.60 (82.59) | -0.01 (0.01) | -0.01 (0.02) | 4.64 (0.14) | 1.66 (0.11) | 11.11 (4.94) | 152.93 (94.70) | -0.01 (0.02) | -0.00 (0.02) | 3.56 (0.13) |
| MAXDIAG+AE(E)    | 1.41 (0.06) | 3.10 (0.22) | 54.51 (10.02)  | 1.00 (0.00)  | 1.00 (0.00)  | 3.43 (0.18) | 1.46 (0.03) | 4.39 (0.58)  | 40.55 (6.57)   | 0.73 (0.05)  | 0.13 (0.04)  | 3.34 (0.08) |
| MAXDIAG+AE(F)    | 1.99 (0.11) | 3.86 (0.09) | 57.57 (11.20)  | 0.57 (0.07)  | -0.09 (0.01) | 6.53 (0.51) | 1.35 (0.03) | 4.10 (0.45)  | 40.36 (6.39)   | 1.00 (0.00)  | 1.00 (0.00)  | 2.73 (0.05) |
| MAXDIAG+QBC(E)   | 1.50 (0.07) | 3.17 (0.28) | 53.36 (11.44)  | 0.61 (0.07)  | 0.60 (0.02)  | 3.28 (0.09) | 1.52 (0.03) | 4.44 (0.47)  | 38.69 (5.80)   | 0.57 (0.04)  | -0.00 (0.02) | 3.40 (0.04) |
| MAXDIAG+QBC(F)   | 1.64 (0.06) | 3.22 (0.19) | 48.95 (9.08)   | 0.71 (0.04)  | -0.03 (0.03) | 4.12 (0.15) | 1.34 (0.02) | 4.16 (0.43)  | 38.04 (5.49)   | 0.89 (0.01)  | 0.92 (0.01)  | 2.73 (0.07) |
| MAXDIAG+GP(LL)   | 1.56 (0.09) | 3.05 (0.33) | 53.02 (12.34)  | 0.67 (0.06)  | 0.28 (0.02)  | 4.44 (0.34) | 1.42 (0.03) | 4.42 (0.56)  | 41.50 (7.16)   | 0.83 (0.06)  | 0.16 (0.02)  | 3.04 (0.06) |
| MAXDIAG+GP(RP)   | 1.42 (0.05) | 2.83 (0.24) | 50.71 (7.06)   | 0.66 (0.05)  | 0.29 (0.02)  | 3.90 (0.15) | 1.41 (0.03) | 4.35 (0.53)  | 39.67 (6.49)   | 0.88 (0.01)  | 0.27 (0.02)  | 2.97 (0.04) |
| MAXDET+GP(LL)    | 1.52 (0.07) | 3.20 (0.21) | 54.74 (9.58)   | 0.69 (0.02)  | 0.35 (0.02)  | 4.17 (0.26) | 1.35 (0.02) | 4.30 (0.53)  | 40.42 (6.63)   | 0.83 (0.02)  | 0.00 (0.03)  | 2.79 (0.04) |
| MAXDET+GP(RP)    | 1.38 (0.10) | 2.80 (0.32) | 46.51 (13.29)  | 0.69 (0.04)  | 0.30 (0.02)  | 3.76 (0.24) | 1.33 (0.03) | 4.47 (0.59)  | 43.01 (6.80)   | 0.86 (0.02)  | 0.00 (0.05)  | 2.78 (0.02) |
| MAXDIST+GP(LL)   | 1.58 (0.10) | 3.28 (0.29) | 54.74 (13.09)  | 0.66 (0.07)  | -0.03 (0.03) | 4.59 (0.28) | 1.29 (0.04) | 4.26 (0.40)  | 39.65 (4.69)   | 0.85 (0.04)  | 0.65 (0.01)  | 2.72 (0.03) |
| MAXDIST+GP(RP)   | 1.52 (0.04) | 3.18 (0.28) | 56.24 (13.95)  | 0.69 (0.06)  | -0.00 (0.01) | 4.56 (0.22) | 1.28 (0.03) | 4.26 (0.40)  | 39.17 (5.42)   | 0.92 (0.01)  | 0.65 (0.00)  | 2.70 (0.04) |
| MAXDIST+FEAT(LL) | 1.56 (0.06) | 2.98 (0.24) | 49.94 (11.10)  | 0.61 (0.04)  | 0.11 (0.04)  | 4.52 (0.29) | 1.34 (0.02) | 4.32 (0.53)  | 39.78 (5.35)   | 0.81 (0.02)  | 0.31 (0.03)  | 2.85 (0.04) |
| MAXDIST+FEAT(RP) | 1.56 (0.06) | 3.22 (0.22) | 54.05 (11.97)  | 0.66 (0.03)  | 0.11 (0.02)  | 4.56 (0.20) | 1.34 (0.02) | 4.39 (0.57)  | 40.94 (7.17)   | 0.83 (0.02)  | 0.31 (0.03)  | 2.85 (0.05) |
| LCMD+FEAT(LL)    | 1.51 (0.08) | 3.12 (0.12) | 54.27 (8.68)   | 0.58 (0.03)  | 0.17 (0.02)  | 4.23 (0.21) | 1.30 (0.03) | 4.21 (0.47)  | 40.92 (5.34)   | 0.79 (0.02)  | 0.32 (0.01)  | 2.87 (0.03) |
| LCMD+FEAT(RP)    | 1.59 (0.12) | 3.28 (0.41) | 60.18 (17.22)  | 0.58 (0.07)  | 0.15 (0.03)  | 4.32 (0.33) | 1.33 (0.02) | 4.35 (0.60)  | 41.57 (8.13)   | 0.81 (0.02)  | 0.33 (0.03)  | 2.96 (0.02) |

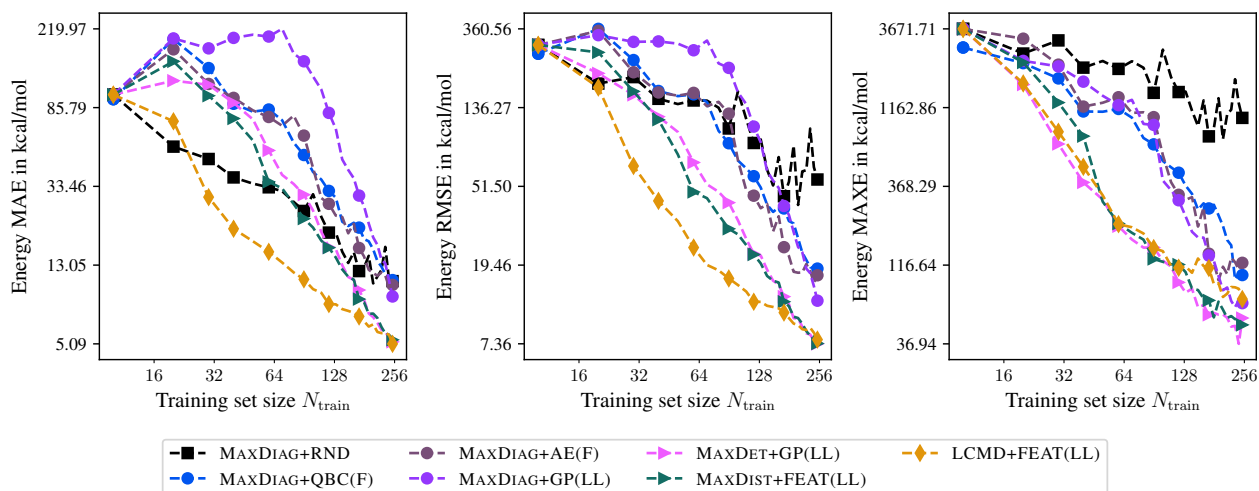

Figure 10 Learning curves for the  $\text{TiO}_2$  data set.<sup>8,9</sup> The mean absolute errors (MAE), root-mean-square errors (RMSE), and maximum errors (MAXE) of the total energy are plotted against the training set size acquired during BMDAL. All corresponding values are given for the  $(10, 250; 10)_{\text{TiO}_2}$  BMDAL experiment. The markers show only a subset of all BMDAL steps for better visibility, while the lines use all steps. The training errors before the first BMDAL step are identical for most methods since they use the same random seed. This does not apply to QbC, where more models are trained.

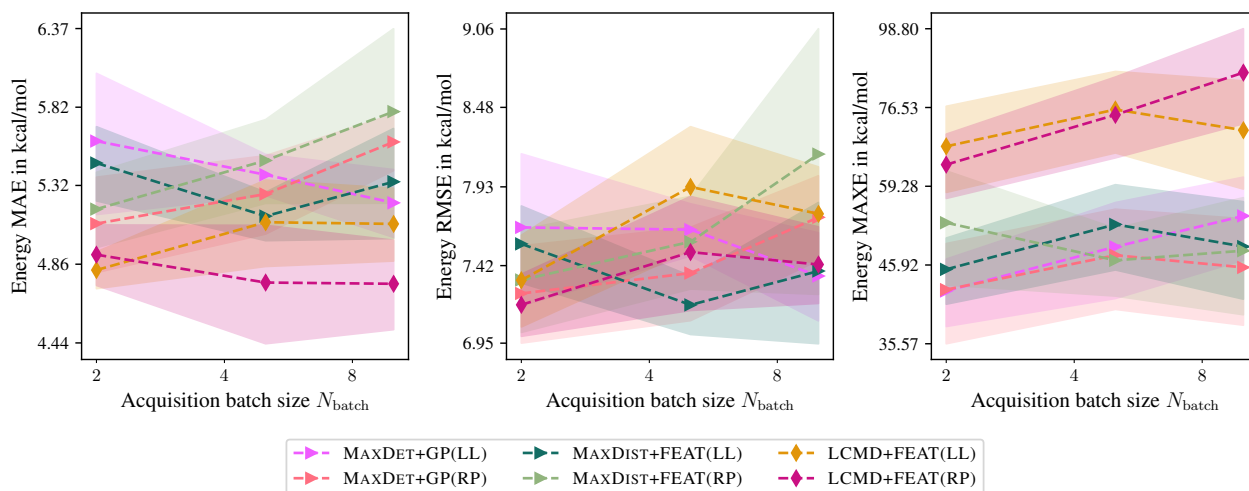

Figure 11 Comparison of the last layer and random projections gradient feature maps on the  $\text{TiO}_2$  data set.<sup>8,9</sup> The mean absolute errors (MAE), root-mean-square errors (RMSE), and maximum errors (MAXE) of the total energy are plotted against the acquired batch size  $N_{\text{batch}}$ . All corresponding values are given for the  $(10, 250; \{2, 5, 10\})_{\text{TiO}_2}$  BMDAL experiments. Shaded areas denote the standard error on the mean evaluated over five independent runs.

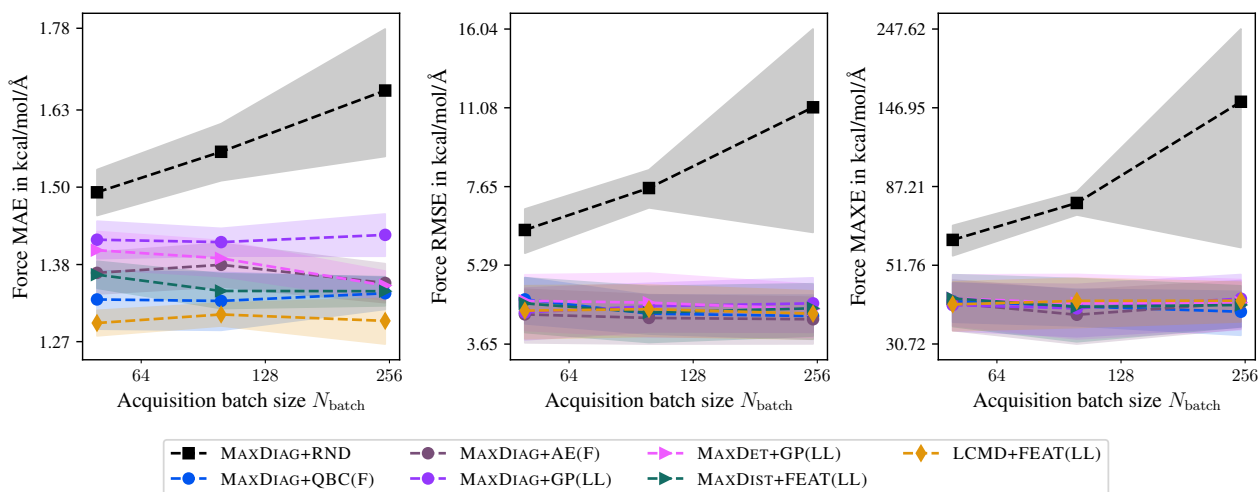

Figure 12 Dependence of the mean absolute errors (MAE), root-mean-square errors (RMSE), and maximum errors (MAXE) of atomic forces on the acquired batch size  $N_{\text{batch}}$ . All errors are evaluated for the last BMDAL step on the  $\text{TiO}_2$  data set.<sup>8,9</sup> All corresponding values are given for the  $(500, 2500; \{50, 100, 250\})_{\text{TiO}_2}$  BMDAL experiments. Shaded areas denote the standard error on the mean evaluated over five independent runs.

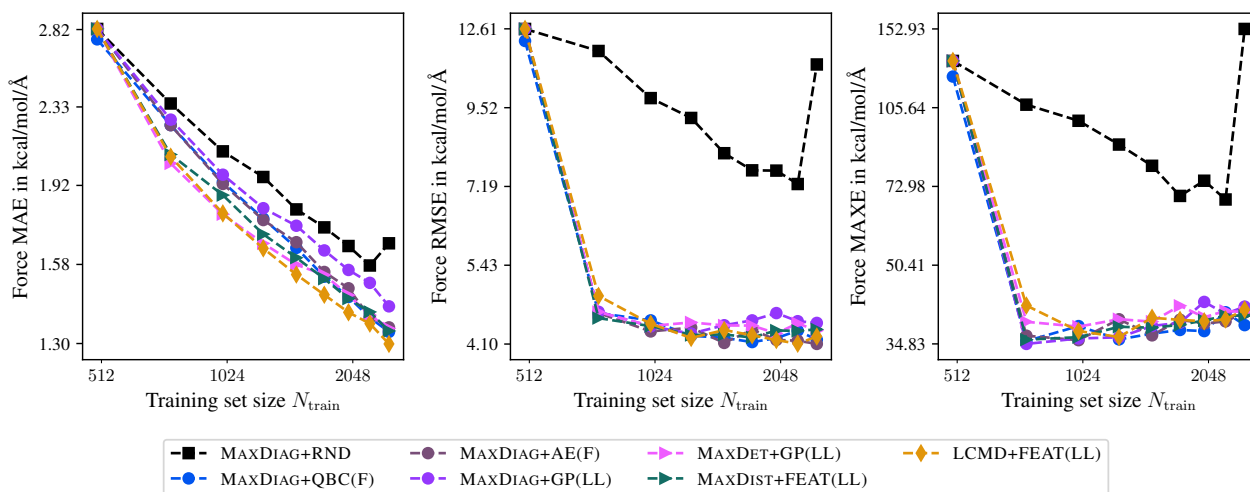

Figure 13 Learning curves for the  $\text{TiO}_2$  data set.<sup>8,9</sup> The mean absolute errors (MAE), root-mean-square errors (RMSE), and maximum errors (MAXE) of atomic forces are plotted against the training set size acquired during BMDAL. All corresponding values are given for the  $(500, 2500; 250)_{\text{TiO}_2}$  BMDAL experiment. The training errors before the first BMDAL step are identical for most methods since they use the same random seed. This does not apply to QbC, where more models are trained.

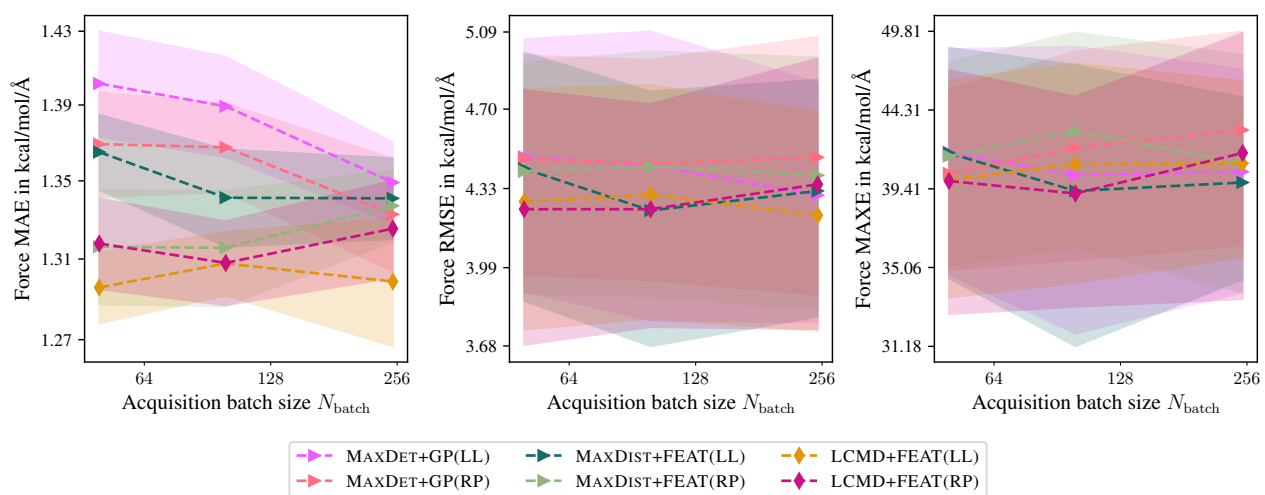

Figure 14 Comparison of the last layer and random projections gradient feature maps on the  $\text{TiO}_2$  data set.<sup>8,9</sup> The mean absolute errors (MAE), root-mean-square errors (RMSE), and maximum errors (MAXE) of atomic forces are plotted against the acquired batch size  $N_{\text{batch}}$ . All corresponding values are given for the  $(500, 2500; \{50, 100, 250\})_{\text{TiO}_2}$  BMDAL experiments. Shaded areas denote the standard error on the mean evaluated over five independent runs.

## 4 LMNTO

Here, additional results on the LMNTO data set<sup>10,11</sup> are presented. Table 13 and Table 14 present the numerical values for the mean absolute error (MAE), root-mean-square error (RMSE), maximum error (MAXE), Pearson (PCC) and Spearman (SRC) correlation coefficients, as well as 95% quantile, evaluated on test data for total energies and forces. While Table 13 provides with the errors averaged over the learning curve, Table 14 shows the performance of the final model. All results are given for the  $(100, 1000; 100)_{\text{LMNTO}}$  BMDAL experiment.

Fig. 15, and Fig. 16 present the the learning curves and batch size dependence for the  $(100, 1000; 100)_{\text{LMNTO}}$  or  $(100, 1000; \{25, 50, 100\})_{\text{LMNTO}}$  experiments, respectively. Fig. 17, Fig. 18, and Fig. 19 complement the results obtained on atomic forces with the results for the total energy.

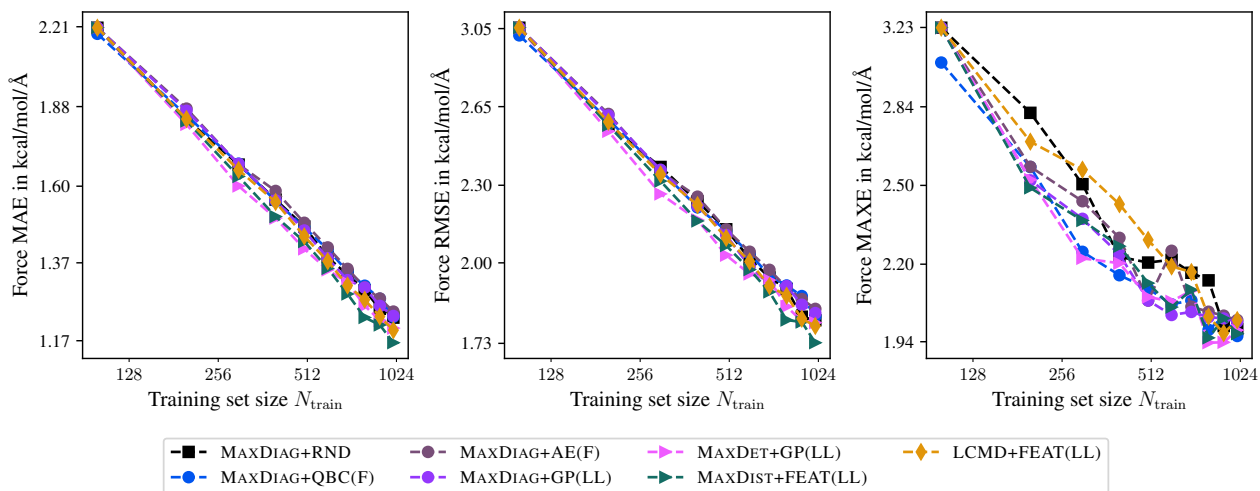

Figure 15 Learning curves for the LMNTO data set.<sup>10,11</sup> The mean absolute errors (MAE), root-mean-square errors (RMSE), and maximum errors (MAXE) of atomic forces are plotted against the training set size acquired during BMDAL. All corresponding values are given for the  $(100, 1000; 100)_{\text{LMNTO}}$  BMDAL experiment. The training errors before the first BMDAL step are identical for most methods since they use the same random seed. This does not apply to QbC, where more models are trained.

Table 13 The mean absolute error (MAE), root-mean-square error (RMSE), maximum error (MAXE), Pearson (PCC) and Spearman (SRC) correlation coefficients for total energies and atomic forces evaluated on test data. All values are computed for (100,1000;100)<sub>LMNTO</sub> as an average over AL steps. The energy errors are given in kcal/mol, while the force errors are in kcal/mol/Å. All times are given in seconds. Standard errors on the mean are given in parentheses.

| Method           | Energy      |             |             |             |             | Force       |             |             |             |              | Time         |             |                 |             |
|------------------|-------------|-------------|-------------|-------------|-------------|-------------|-------------|-------------|-------------|--------------|--------------|-------------|-----------------|-------------|
|                  | MAE         | RMSE        | MAXE        | PCC         | SRC         | 95%         | MAE         | RMSE        | MAXE        | PCC          | SRC          | 95%         | Kernel          | Selection   |
| MAXDIAG+RND      | 0.90 (0.03) | 1.13 (0.03) | 3.72 (0.20) | 0.01 (0.02) | 0.01 (0.02) | 2.22 (0.08) | 1.52 (0.03) | 2.18 (0.04) | 2.35 (0.15) | -0.02 (0.03) | -0.01 (0.03) | 1.90 (0.05) | 0.01 (0.00)     | 0.00 (0.00) |
| MAXDIAG+AE(E)    | 0.88 (0.03) | 1.10 (0.04) | 3.69 (0.32) | 1.00 (0.00) | 1.00 (0.00) | 2.13 (0.08) | 1.56 (0.04) | 2.24 (0.05) | 2.39 (0.18) | 0.06 (0.03)  | 0.05 (0.03)  | 1.94 (0.06) | 19.32 (3.11)    | 0.00 (0.00) |
| MAXDIAG+AE(F)    | 0.90 (0.02) | 1.14 (0.03) | 3.78 (0.30) | 0.12 (0.03) | 0.11 (0.03) | 2.20 (0.06) | 1.54 (0.03) | 2.20 (0.04) | 2.30 (0.16) | 1.00 (0.00)  | 1.00 (0.00)  | 1.88 (0.05) | 16.64 (1.86)    | 0.00 (0.00) |
| MAXDIAG+QBC(E)   | 0.89 (0.02) | 1.12 (0.03) | 3.49 (0.35) | 0.29 (0.03) | 0.34 (0.02) | 1.89 (0.08) | 1.54 (0.02) | 2.21 (0.02) | 2.26 (0.13) | 0.19 (0.03)  | 0.17 (0.03)  | 1.87 (0.03) | 33.74 (0.71)    | 0.01 (0.01) |
| MAXDIAG+QBC(F)   | 0.89 (0.02) | 1.13 (0.02) | 3.31 (0.21) | 0.13 (0.04) | 0.13 (0.03) | 1.88 (0.06) | 1.53 (0.02) | 2.19 (0.02) | 2.22 (0.16) | 0.84 (0.01)  | 0.77 (0.02)  | 1.84 (0.03) | 33.65 (0.74)    | 0.01 (0.00) |
| MAXDIAG+GP(LL)   | 0.90 (0.02) | 1.13 (0.03) | 3.73 (0.27) | 0.13 (0.04) | 0.08 (0.02) | 2.24 (0.06) | 1.53 (0.03) | 2.19 (0.04) | 2.25 (0.13) | 0.37 (0.04)  | 0.44 (0.03)  | 1.87 (0.04) | 10.06 (0.34)    | 0.00 (0.00) |
| MAXDIAG+GP(RP)   | 0.91 (0.02) | 1.15 (0.03) | 3.82 (0.28) | 0.13 (0.04) | 0.08 (0.02) | 2.22 (0.06) | 1.53 (0.03) | 2.20 (0.04) | 2.28 (0.14) | 0.60 (0.02)  | 0.59 (0.02)  | 1.89 (0.04) | 186.09 (173.20) | 0.00 (0.00) |
| MAXDET+GP(LL)    | 0.89 (0.02) | 1.12 (0.03) | 3.71 (0.22) | 0.14 (0.05) | 0.08 (0.03) | 2.18 (0.07) | 1.49 (0.03) | 2.14 (0.04) | 2.23 (0.13) | 0.36 (0.04)  | 0.44 (0.03)  | 1.84 (0.04) | 12.57 (2.62)    | 0.51 (0.07) |
| MAXDET+GP(RP)    | 0.87 (0.02) | 1.10 (0.03) | 3.67 (0.22) | 0.11 (0.05) | 0.06 (0.03) | 2.18 (0.06) | 1.48 (0.03) | 2.12 (0.04) | 2.20 (0.13) | 0.60 (0.03)  | 0.60 (0.02)  | 1.82 (0.04) | 13.55 (1.03)    | 0.47 (0.02) |
| MAXDIST+GP(LL)   | 0.86 (0.03) | 1.09 (0.03) | 3.64 (0.28) | 0.07 (0.03) | 0.05 (0.02) | 2.12 (0.07) | 1.48 (0.03) | 2.14 (0.04) | 2.24 (0.13) | 0.66 (0.03)  | 0.55 (0.03)  | 1.84 (0.04) | 11.67 (0.83)    | 1.16 (0.14) |
| MAXDIST+GP(RP)   | 0.87 (0.02) | 1.10 (0.03) | 3.69 (0.22) | 0.05 (0.02) | 0.05 (0.02) | 2.16 (0.06) | 1.48 (0.03) | 2.13 (0.04) | 2.23 (0.14) | 0.67 (0.02)  | 0.56 (0.02)  | 1.83 (0.04) | 13.14 (1.13)    | 1.15 (0.15) |
| MAXDIST+FEAT(LL) | 0.87 (0.02) | 1.10 (0.03) | 3.74 (0.30) | 0.06 (0.04) | 0.02 (0.02) | 2.14 (0.08) | 1.48 (0.03) | 2.14 (0.04) | 2.26 (0.16) | 0.61 (0.03)  | 0.49 (0.03)  | 1.85 (0.05) | 11.76 (1.27)    | 1.07 (0.12) |
| MAXDIST+FEAT(RP) | 0.87 (0.02) | 1.10 (0.03) | 3.64 (0.26) | 0.05 (0.03) | 0.04 (0.02) | 2.15 (0.06) | 1.48 (0.02) | 2.13 (0.03) | 2.30 (0.15) | 0.62 (0.03)  | 0.47 (0.03)  | 1.84 (0.04) | 13.45 (0.69)    | 1.17 (0.12) |
| LCMID+FEAT(LL)   | 0.88 (0.02) | 1.11 (0.03) | 3.83 (0.34) | 0.12 (0.04) | 0.08 (0.02) | 2.17 (0.06) | 1.51 (0.03) | 2.17 (0.04) | 2.36 (0.18) | 0.65 (0.03)  | 0.56 (0.02)  | 1.88 (0.05) | 10.85 (0.26)    | 1.46 (0.05) |
| LCMID+FEAT(RP)   | 0.88 (0.02) | 1.12 (0.03) | 4.10 (0.29) | 0.12 (0.03) | 0.10 (0.03) | 2.18 (0.06) | 1.50 (0.03) | 2.16 (0.03) | 2.35 (0.15) | 0.67 (0.02)  | 0.56 (0.02)  | 1.88 (0.04) | 13.19 (0.25)    | 1.46 (0.05) |



Table 14 The mean absolute error (MAE), root-mean-square error (RMSE), maximum error (MAXE), Pearson (PCC) and Spearman (SRC) correlation coefficients for total energies and atomic forces evaluated on test data. All values are computed employing the final model obtained for the (100, 1000; 100)<sub>LMNTO</sub> experiment. The energy errors are given in kcal/mol, while the force errors are in kcal/mol/Å. Standard errors on the mean are given in parentheses.

| Method           | Energy      |             |             |             |             | Force       |             |             |             |              |              |             |
|------------------|-------------|-------------|-------------|-------------|-------------|-------------|-------------|-------------|-------------|--------------|--------------|-------------|
|                  | MAE         | RMSE        | MAXE        | PCC         | SRC         | 95%         | MAE         | RMSE        | MAXE        | PCC          | SRC          | 95%         |
| MAXDIAG+RND      | 0.72 (0.02) | 0.90 (0.02) | 2.96 (0.16) | 0.03 (0.02) | 0.02 (0.01) | 1.79 (0.04) | 1.23 (0.02) | 1.80 (0.02) | 1.98 (0.14) | -0.02 (0.03) | -0.01 (0.03) | 1.57 (0.03) |
| MAXDIAG+AE(E)    | 0.64 (0.02) | 0.82 (0.03) | 3.58 (0.73) | 1.00 (0.00) | 1.00 (0.00) | 1.58 (0.04) | 1.25 (0.03) | 1.85 (0.04) | 2.07 (0.20) | 0.05 (0.03)  | 0.03 (0.02)  | 1.62 (0.05) |
| MAXDIAG+AE(F)    | 0.68 (0.02) | 0.86 (0.02) | 2.96 (0.22) | 0.11 (0.05) | 0.12 (0.03) | 1.69 (0.02) | 1.24 (0.02) | 1.84 (0.03) | 2.01 (0.21) | 1.00 (0.00)  | 1.00 (0.00)  | 1.59 (0.03) |
| MAXDIAG+QBC(E)   | 0.67 (0.02) | 0.85 (0.03) | 2.72 (0.43) | 0.27 (0.01) | 0.33 (0.01) | 1.39 (0.06) | 1.25 (0.01) | 1.85 (0.02) | 1.96 (0.16) | 0.18 (0.02)  | 0.16 (0.03)  | 1.58 (0.02) |
| MAXDIAG+QBC(F)   | 0.69 (0.01) | 0.87 (0.01) | 2.57 (0.10) | 0.09 (0.02) | 0.11 (0.03) | 1.42 (0.04) | 1.23 (0.01) | 1.82 (0.02) | 1.96 (0.20) | 0.90 (0.01)  | 0.81 (0.02)  | 1.54 (0.02) |
| MAXDIAG+GP(LL)   | 0.69 (0.02) | 0.87 (0.02) | 2.98 (0.26) | 0.19 (0.06) | 0.09 (0.02) | 1.71 (0.06) | 1.23 (0.03) | 1.83 (0.05) | 2.00 (0.21) | 0.38 (0.04)  | 0.46 (0.04)  | 1.58 (0.06) |
| MAXDIAG+GP(RP)   | 0.68 (0.02) | 0.84 (0.02) | 2.90 (0.18) | 0.11 (0.03) | 0.08 (0.02) | 1.63 (0.05) | 1.21 (0.02) | 1.80 (0.03) | 1.89 (0.16) | 0.63 (0.02)  | 0.67 (0.01)  | 1.56 (0.03) |
| MAXDEF+GP(LL)    | 0.67 (0.01) | 0.86 (0.02) | 3.07 (0.37) | 0.17 (0.08) | 0.08 (0.02) | 1.69 (0.05) | 1.20 (0.03) | 1.80 (0.04) | 1.98 (0.17) | 0.37 (0.03)  | 0.49 (0.03)  | 1.56 (0.05) |
| MAXDEF+GP(RP)    | 0.67 (0.01) | 0.85 (0.01) | 2.90 (0.17) | 0.13 (0.04) | 0.07 (0.03) | 1.75 (0.05) | 1.17 (0.02) | 1.75 (0.03) | 1.88 (0.12) | 0.63 (0.02)  | 0.68 (0.01)  | 1.52 (0.03) |
| MAXDIST+GP(LL)   | 0.63 (0.02) | 0.81 (0.03) | 2.95 (0.25) | 0.11 (0.04) | 0.06 (0.01) | 1.53 (0.06) | 1.17 (0.02) | 1.77 (0.03) | 1.96 (0.16) | 0.81 (0.01)  | 0.72 (0.02)  | 1.55 (0.03) |
| MAXDIST+GP(RP)   | 0.65 (0.02) | 0.82 (0.02) | 2.64 (0.13) | 0.07 (0.02) | 0.07 (0.01) | 1.60 (0.05) | 1.16 (0.02) | 1.74 (0.02) | 1.87 (0.10) | 0.84 (0.01)  | 0.72 (0.01)  | 1.54 (0.02) |
| MAXDIST+FEAT(LL) | 0.65 (0.02) | 0.84 (0.03) | 3.07 (0.47) | 0.13 (0.07) | 0.06 (0.03) | 1.59 (0.04) | 1.17 (0.03) | 1.73 (0.04) | 1.97 (0.24) | 0.75 (0.02)  | 0.64 (0.02)  | 1.52 (0.03) |
| MAXDIST+FEAT(RP) | 0.64 (0.01) | 0.80 (0.02) | 2.80 (0.19) | 0.08 (0.04) | 0.07 (0.03) | 1.59 (0.04) | 1.17 (0.02) | 1.77 (0.03) | 2.13 (0.26) | 0.77 (0.01)  | 0.64 (0.02)  | 1.56 (0.04) |
| LCMD+FEAT(LL)    | 0.65 (0.01) | 0.84 (0.02) | 2.94 (0.32) | 0.18 (0.04) | 0.11 (0.01) | 1.68 (0.05) | 1.20 (0.03) | 1.79 (0.04) | 2.01 (0.18) | 0.76 (0.03)  | 0.68 (0.02)  | 1.57 (0.04) |
| LCMD+FEAT(RP)    | 0.69 (0.02) | 0.89 (0.03) | 3.27 (0.18) | 0.09 (0.02) | 0.06 (0.01) | 1.80 (0.07) | 1.18 (0.02) | 1.76 (0.03) | 1.94 (0.15) | 0.78 (0.01)  | 0.68 (0.01)  | 1.55 (0.04) |

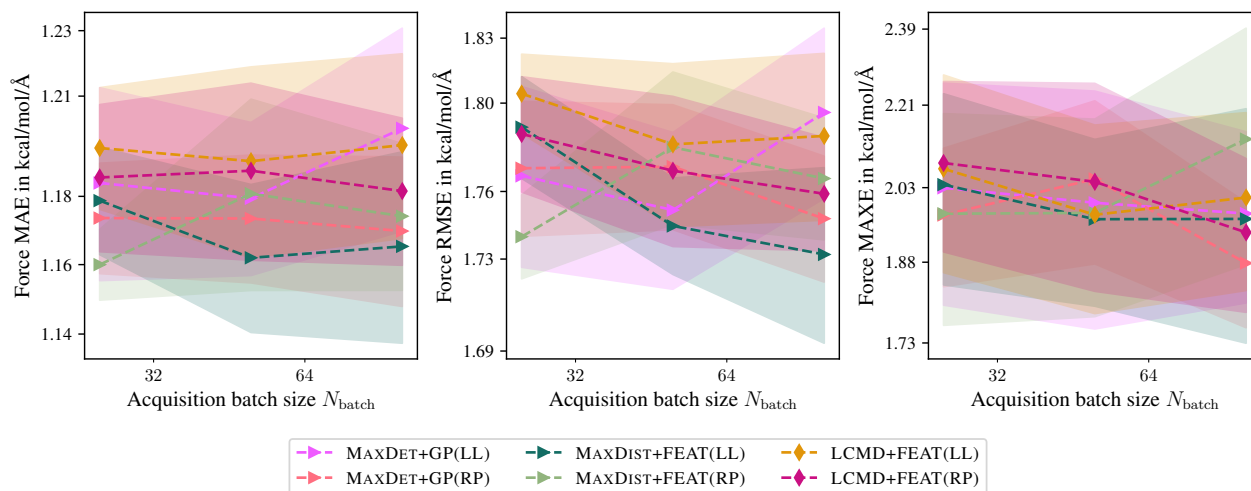

Figure 16 Comparison of the last layer and random projections gradient feature maps on the LMNTO data set.<sup>10,11</sup> The mean absolute errors (MAE), root-mean-square errors (RMSE), and maximum errors (MAXE) of atomic forces are plotted against the acquired batch size  $N_{\text{batch}}$ . All corresponding values are given for the  $(100, 1000; \{25, 50, 100\})_{\text{LMNTO}}$  BMDAL experiments. Shaded areas denote the standard error on the mean evaluated over five independent runs.

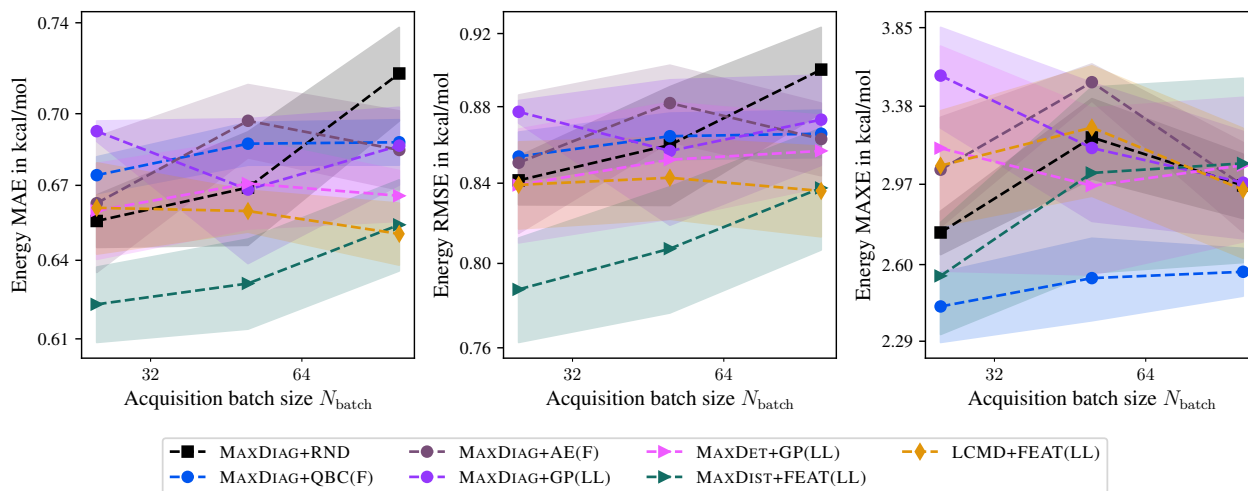

Figure 17 Dependence of the mean absolute errors (MAE), root-mean-square errors (RMSE), and maximum errors (MAXE) of the total energy on the acquired batch size  $N_{\text{batch}}$ . All errors are evaluated for the last BMDAL step on the LMNTO data set.<sup>10,11</sup> All corresponding values are given for the  $(100, 1000; \{25, 50, 100\})_{\text{LMNTO}}$  BMDAL experiments. Shaded areas denote the standard error on the mean evaluated over five independent runs.

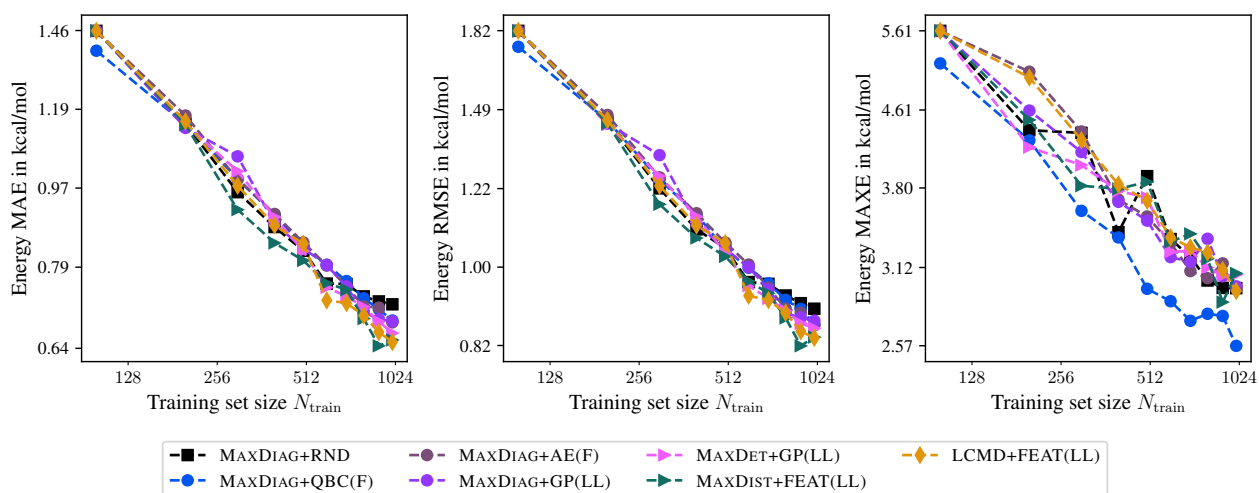

Figure 18 Learning curves for the LMNTO data set.<sup>10,11</sup> The mean absolute errors (MAE), root-mean-square errors (RMSE), and maximum errors (MAXE) of the total energy are plotted against the training set size acquired during BMDAL. All corresponding values are given for the  $(100,1000;100)_{\text{LMNTO}}$  BMDAL experiment. The training errors before the first BMDAL step are identical for most methods since they use the same random seed. This does not apply to QbC, where more models are trained.

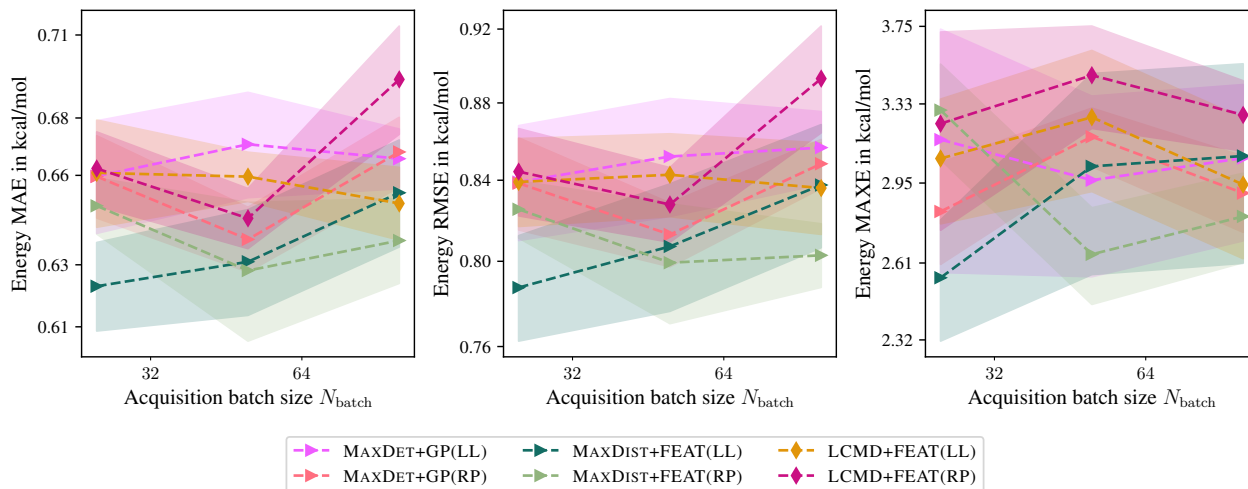

Figure 19 Comparison of the last layer and random projections gradient feature maps on the LMNTO data set.<sup>10,11</sup> The mean absolute errors (MAE), root-mean-square errors (RMSE), and maximum errors (MAXE) of the total energy are plotted against the acquired batch size  $N_{\text{batch}}$ . All corresponding values are given for the  $(100,1000;\{25,50,100\})_{\text{LMNTO}}$  BMDAL experiments. Shaded areas denote the standard error on the mean evaluated over five independent runs.

## Notes and references

- [1] S. Chmiela, A. Tkatchenko, H. E. Sauceda, I. Poltavsky, K. T. Schütt and K.-R. Müller, *Sci. Adv.*, 2017, **3**, e1603015.
- [2] K. T. Schütt, F. Arbabzadah, S. Chmiela, K. R. Müller and A. Tkatchenko, *Nat. Commun.*, 2017, **8**, 13890.
- [3] S. Chmiela, H. E. Sauceda, K.-R. Müller and A. Tkatchenko, *Nat. Commun.*, 2018, **9**, 3887.
- [4] *MD Trajectories of small molecules*, (accessed 17 December 2020), [www.quantum-machine.org/gdml](http://www.quantum-machine.org/gdml).
- [5] L. Ruddigkeit, R. van Deursen, L. C. Blum and J.-L. Reymond, *J. Chem. Inf. Model.*, 2012, **52**, 2864–2875.
- [6] R. Ramakrishnan, P. O. Dral, M. Rupp and O. A. von Lilienfeld, *Sci. Data*, 2014, **1**, 140022.
- [7] R. Ramakrishnan, P. Dral, M. Rupp and O. A. von Lilienfeld, *Quantum chemistry structures and properties of 134 kilo molecules*, 2014, <https://doi.org/10.6084/m9.figshare.c.978904.v5>.
- [8] N. Artrith and A. Urban, *Comput. Mater. Sci.*, 2016, **114**, 135–150.
- [9] *TiO<sub>2</sub> bulk structures*, (accessed 18 March 2021), <http://ann.atomistic.net/download/>.
- [10] A. M. Cooper, J. Kästner, A. Urban and N. Artrith, *Npj Comput. Mater.*, 2020, **6**, 1–14.
- [11] A. Cooper, J. Kästner, A. Urban and N. Artrith, *Efficient Training of ANN Potentials by Including Atomic Forces via Taylor Expansion and Application to Water and a Transition-Metal Oxide*, 2020, [10.24435/materialscloud:2020.0037/v1](https://doi.org/10.24435/materialscloud:2020.0037/v1).
